# Supplementary material for: Comprehensive evaluation of ten docking programs on a diverse set of protein–ligand complexes: the prediction accuracy of sampling power and scoring power
Source: Royal Society of Chemistry journal article supplement (doi:10.1039/c6cp01555g), 2016-01-01
Supplement: c6cp01555g2.xlsx [file c6cp01555g2.xlsx]

## Sheet: Sheet1
AutoDock (LGA)		AutoDock (PSO)		AutoDock Vina		LeDock		rDock		UCSF Dock		LigandFit		Glide (SP)		Glide (XP)		Gold		MOE Dock		Surflex-Dock		All
pdb_id	bp_rmsd	pdb_id	bp_rmsd	pdb_id	bp_rmsd	pdb_id	bp_rmsd	pdb_id	bp_rmsd	pdb_id	bp_rmsd	pdb_id	bp_rmsd	pdb_id	bp_rmsd	pdb_id	bp_rmsd	pdb_id	bp_rmsd	pdb_id	bp_rmsd	pdb_id	bp_rmsd	pdb_id	failure times
10gs	3.95	10gs	4.31	10gs	2.56	1a1e	2.22	1a30	2.31	10gs	9.6037	10gs	3.82	1a1e	2.272	10gs	2.44	185l	3.645	10gs	5.86	10gs	4.93	4kcx	12
1a1e	4.42	1a1e	2.02	1a30	3.11	1a30	5.09	1a94	4.98	1a30	5.8885	1a30	6.12	1a30	2.229	1a1e	3.08	1adl	2.22	1a1e	3.49	1a30	4.01	4j7e	12
1a30	3.47	1a30	3.75	1a9m	2.93	1a4w	2.24	1a9m	3.88	1a4w	3.5939	1a4w	2.21	1a4h	3.784	1a30	4.04	1ado	3.839	1a30	2.83	1a69	2.39	4h75	12
1a4w	2.41	1a4h	4.83	1a9q	2.41	1a69	2.1	1a9q	2.44	1a94	14.5659	1adl	3.67	1a4w	3.707	1a4h	4.452	1aid	3.641	1a4w	3.53	1a94	12.43	4gah	12
1a94	11.56	1a94	3.17	1adl	2.13	1a94	2.2	1aaq	3.43	1aaq	11.829	1ado	4.27	1ado	3.398	1a4w	5.496	1amw	3.401	1a94	3.18	1a9m	3	4fnn	12
1a9m	4.11	1a9m	2.23	1ado	2.31	1a9m	2.04	1adl	2.59	1adl	5.4117	1aid	3.22	1afl	3.598	1a94	3.002	1apv	8.852	1a9m	3.58	1adl	3.12	4ezx	12
1a9q	2.42	1a9q	2.42	1afl	2.06	1a9q	2.43	1aid	2.5	1ado	3.8939	1amw	3.12	1aid	3.864	1aaq	11.848	1apw	8.904	1aaq	2.36	1ado	3.86	4e67	12
1aaq	3.19	1adl	2.14	1aid	3.18	1aaq	3.67	1amw	2.18	1afk	2.9931	1bhf	2.81	1amw	3.184	1adl	3.567	1bai	6.742	1adl	3.67	1aid	3.8	4dy6	12
1adl	2.16	1aid	3.59	1amw	2.65	1aid	2.76	1bai	2.43	1afl	7.1548	1bhx	2.41	1bai	6.28	1ado	4.466	1bhf	2.659	1afl	2.9	1bai	2.96	3zk6	12
1afl	3.34	1amw	3.38	1bai	2.36	1bai	2.19	1bhx	3.87	1aid	10.1839	1bm7	6	1bhf	2.001	1afl	3.866	1bxq	4.507	1aid	2.04	1bq4	2.37	3vvy	12
1aid	3.66	1apv	6.83	1bp0	3.76	1bhf	4.38	1bwb	2.04	1ajv	8.3938	1bp0	5.87	1c2t	3.581	1aid	10.087	1c70	4.741	1ajx	2.87	1bxo	2.46	3uyr	12
1amk	3.25	1apw	5.15	1bq4	2.22	1cet	2.53	1bxq	3.64	1ajx	8.6693	1bq4	2.53	1c70	5.129	1amw	2.614	1cet	2.314	1amw	4.19	1bxq	3.86	3usx	12
1apv	4.08	1bai	6.2	1br6	3.11	1ct8	2.27	1c70	4.27	1amw	2.5372	1br6	2.24	1cet	2.197	1bai	6.697	1d4y	3.1	1apv	3.33	1cet	7.83	3uri	12
1apw	2.8	1bcu	2.31	1bxq	6.96	1d6w	3.23	1d3d	2.35	1apv	7.9546	1bv7	4.89	1ct8	6.03	1bcu	4.057	1det	2.123	1apw	3.65	1d4h	4.53	3umq	12
1b6j	3	1bhf	3.8	1c4u	2.14	1dif	2.85	1d4h	2.64	1b3g	6.7436	1bwa	3.31	1d3p	2.496	1bhf	4.026	1dif	3.757	1b0h	3.15	1d4p	2.13	3uil	12
1bai	10.59	1bhx	2.28	1cet	2.21	1e3v	7.52	1d4i	4.3	1b3h	6.7468	1bxq	3.76	1d4h	4.155	1bp0	6.091	1dqx	6.167	1b1h	6.32	1dfo	3.18	3r0y	12
1bcu	2.19	1bxo	8.54	1ct8	2.39	1ec2	2.2	1d4j	3.86	1b40	9.7739	1c2t	2.28	1d4i	5.495	1c2t	6.64	1drv	2.336	1b3l	4.08	1dzk	2.33	3o5x	12
1bdq	2.38	1bxq	3.59	1d3p	7.74	1ec3	2.25	1d6w	2.52	1b58	7.4938	1c4u	2.3	1d4y	3.692	1c4u	3.065	1dzk	3.95	1b51	2.43	1e3v	2.86	3lzz	12
1bhf	4.87	1c2t	6.7	1d6w	2.44	1f4e	4.48	1d9i	2.25	1b6j	12.1984	1c70	5.96	1d6w	6.636	1cet	2.537	1e3v	7.388	1b6h	3.61	1ec0	3.83	3jzh	12
1bhx	3.08	1c3e	7.62	1det	4.41	1f4f	2.02	1dif	3.73	1bai	10.3877	1cet	2.84	1d9i	2.468	1ct8	10.366	1ebz	2.454	1b6j	2.67	1f4f	8.03	3ifl	12
1bq4	2.3	1c4u	2.31	1dif	2.23	1f5l	2.07	1drv	2.7	1bdq	11.2705	1d3p	2.02	1det	4.752	1d3p	2.642	1ec3	2.032	1bai	7.65	1fao	3.84	3ie3	12
1br6	2.56	1c70	2.56	1dzk	2.07	1fch	3.05	1e3v	4.48	1bgq	2.2602	1d4k	2.31	1dif	3.866	1d4h	4.26	1efy	2.475	1bdq	3.71	1fhd	5.58	3i73	12
1bv9	2.07	1cet	2.5	1fch	4.24	1fiv	2.47	1ebw	2.44	1bhx	3.4141	1d4l	2.25	1e3v	7.678	1d4i	9.651	1epo	8.506	1bhf	2.07	1fiv	3.95	3h89	12
1bwa	2.39	1d3d	3.38	1fhd	2.27	1fkn	4.45	1ebz	2.53	1bm7	5.9847	1d6w	2.63	1ebw	3.634	1d4j	5.721	1fch	5.348	1bhx	2.68	1flr	2.41	3h1x	12
1bwb	2.07	1d3p	2.22	1fkn	4.75	1fo0	4.05	1ec2	2.07	1bp0	3.145	1d7i	4.01	1eby	2.117	1d4y	4.306	1fh9	6.893	1bm7	2.67	1g7q	4.58	3gx0	12
1bxo	4.74	1d6w	3.2	1fm9	2.24	1fpc	2.14	1ec3	3.9	1bq4	4.3408	1d9i	2.5	1ebz	4.053	1d6w	8.696	1fhd	5.556	1bv9	2.59	1g7v	5.59	3gss	12
1bxq	7.29	1dar	2.16	1fo0	9.41	1g30	2.7	1f4e	2.68	1bv7	14.3572	1dfo	2.25	1ec0	2.189	1d9i	5.956	1fiv	3.766	1bwb	2.76	1g85	2.57	3g34	12
1c5o	2.77	1det	3.04	1fv0	4.22	1g74	2.47	1f4f	2.25	1bv9	12.6576	1drv	4.58	1ec1	8.142	1det	5.025	1fkh	5.035	1bxq	4.91	1gj8	3.09	3g08	12
1c70	4.32	1dif	2.25	1g2o	5.45	1g7q	3.85	1f73	2.04	1bwa	10.2682	1dud	6.26	1ec2	6.691	1dfo	2.01	1fkn	3.678	1bzc	7.16	1gnn	4.24	3fvh	12
1cet	2.51	1drv	2.04	1g32	2.08	1g7v	2.29	1fch	5.36	1bwb	10.942	1e3v	3.58	1ec3	4.805	1dif	2.391	1fo0	5.454	1c2t	2.21	1gno	3	3f8f	12
1ct8	4.49	1dzk	2.97	1g74	2.01	1gnn	3.73	1fiv	3.8	1bxo	10.295	1egh	4.19	1fch	2.486	1dl7	7.369	1fv0	5.359	1c3e	2.37	1gvx	2.16	3eb1	12
1d3p	4.5	1e3v	3.54	1g7q	3.71	1gno	2.27	1fkg	2.1	1bxq	6.8845	1epo	6.31	1fiv	6.129	1dzk	2.287	1g7g	2.093	1c4u	3.53	1h2t	3.39	3eax	12
1d4i	5.58	1e4h	3.72	1g7v	4.93	1gpk	3.59	1fkn	4.31	1byk	2.9302	1fch	4.41	1fkb	7.749	1e2k	2.251	1g7q	2.892	1ct8	4.29	1h6h	2.71	3dxg	12
1d4k	3.93	1ec2	2.21	1gj8	2.62	1gvx	3.5	1fm9	2.16	1c2t	6.5722	1fh9	2.39	1fkn	3.902	1e3v	7.718	1g7v	2.187	1d3d	2.88	1hbv	10.97	3dri	12
1d6w	3.36	1ec3	2.43	1gnm	3.3	1gyy	4.78	1fo0	4.32	1c4u	3.5728	1fhd	6.57	1fo0	4.778	1ebw	3.538	1g85	2.347	1d4h	4.29	1hi3	4.59	3djx	12
1dar	5.43	1epo	6.8	1gnn	3.08	1h2t	3.92	1g32	2.16	1c5c	3.1677	1fm9	2.37	1fq5	7.291	1ebz	5.334	1gar	6.014	1d4j	4.47	1hi5	3.59	3djq	12
1det	4.82	1f4e	2.53	1gno	2.55	1h6h	2.51	1g7g	2.15	1c70	9.6501	1fpc	3.12	1g7v	6.24	1ec0	6.832	1gnn	3.105	1d4y	3.25	1hmr	3.77	3cf8	12
1dif	5.32	1f4f	2.11	1gvx	3.03	1hbv	2.12	1g7q	3.27	1ceb	2.6624	1g32	2.13	1g85	2.573	1ec1	9.977	1gno	2.016	1d6w	2.84	1hms	3.4	3bbb	12
1drv	4.23	1f4g	2.13	1h2t	6.71	1hi3	4.6	1g7v	3.87	1cet	2.1984	1g74	2.63	1gai	2.024	1ec3	4.737	1gpk	3.591	1d9i	2.63	1hmt	3.43	3b5j	12
1dzk	3.01	1fch	8.45	1h6h	5.9	1hi4	3.52	1gar	2.46	1ct8	2.3699	1g7g	4.03	1gar	4.421	1ez9	3.774	1gvw	4.455	1dar	7.66	1hpo	2.83	3aaq	12
1e3v	7.11	1fiv	3.57	1hbv	2.54	1hi5	4.22	1gnm	3.41	1d4h	10.2986	1g7q	5.03	1gnn	3.329	1f4f	3.166	1gvx	3.55	1det	4.45	1hps	3.54	2w5g	12
1e4h	3.71	1fkn	9.04	1hi3	4.67	1hvi	2.44	1gnn	3.73	1d9i	3.2233	1g7v	4.85	1gno	3.2	1f4g	2.319	1h2t	5.797	1dfo	9.16	1hpx	2.66	2v2q	12
1ebw	4.03	1fm9	2.76	1hi4	2.45	1hvj	2.49	1gvw	2.69	1dar	6.1862	1gar	2.63	1gvx	4.077	1fch	2.687	1h6h	3.269	1dif	4.79	1hvj	3.38	2ot1	12
1eby	2.98	1fo0	6.2	1hi5	3.39	1hvk	2.21	1gvx	3.4	1dfo	2.0293	1gcz	6.4	1h2t	8.59	1fhd	6.865	1hbv	3.13	1drv	3.86	1i00	10.23	2hkf	12
1ebz	4.25	1fpc	2.47	1hpo	3.01	1hvl	2.72	1h22	2.82	1drv	2.4002	1gj8	2.11	1h6h	2.049	1fkb	7.343	1hi3	3.605	1dud	3.41	1ivp	4.4	2gj5	12
1ec0	4.32	1fq5	7	1hpx	2.06	1hxb	2.21	1h2t	3.28	1dud	2.1944	1gnm	4.96	1hbv	3.722	1fkn	3.84	1hi5	4.136	1e3v	3.74	1jmf	3.31	2g8r	12
1ec1	6.91	1fv0	4.26	1hvh	4	1hxw	3.32	1h6h	2.9	1e3v	3.5432	1gnn	9.66	1hi3	4.173	1flr	4.408	1hk4	7.688	1e4h	3.51	1jq8	5.01	2eum	12
1ec2	8.42	1g30	2.37	1i00	3.48	1i00	3.02	1hbv	2.91	1ebw	11.4236	1gno	10.76	1hi4	2.585	1fo0	5.5	1hos	2.219	1ebw	4.69	1jqy	2.59	2euk	12
1ec3	3.37	1g74	2.23	1i5r	2.8	1i5r	3.17	1hi3	3.96	1eby	10.106	1gyy	5.29	1hi5	3.919	1fq5	11.217	1hpx	2.661	1ec0	2.35	1jvu	3.11	2er6	12
1efy	2.36	1g7g	6.65	1izi	3.54	1ivp	2.59	1hi4	4.14	1ebz	6.8433	1h0a	4	1hii	3.774	1g2k	8.866	1hsh	2.174	1ec1	2.4	1k6c	2.99	2ce9	12
1epo	7.67	1g7q	6.65	1jlr	4.17	1izi	3.68	1hi5	2.85	1ec0	6.5785	1h22	3.68	1hos	3.189	1g74	4.298	1hvi	2.469	1ec2	2.81	1k6p	4.45	2bvs	12
1f4e	3	1g7v	3.09	1jmf	3.01	1j4r	2.18	1hii	2.24	1ec1	10.8276	1h23	2.97	1hpo	3.683	1g7q	2.039	1hvj	3.077	1ec3	3.97	1km3	2.2	2bvr	12
1f4f	2.51	1g85	3.25	1jmi	2.08	1jq8	2.87	1hos	2.47	1ec3	5.8845	1h2t	2.44	1hpv	2.401	1g7v	6.389	1hvk	3.336	1egh	2.51	1kpm	2.15	2arm	12
1f4g	2.07	1gai	2.27	1jn4	4.65	1jyq	3.08	1hps	3.49	1f4e	4.8265	1h6h	2.07	1hsh	3.942	1g85	4.492	1hvl	2.851	1epo	3.31	1lbk	3.79	1zea	12
1fch	7.15	1gar	2.26	1jq8	3.73	1jys	2.67	1hpx	2.69	1f4f	5.6623	1hbv	3.11	1hvh	3.625	1g98	4.374	1hvs	3.479	1ez9	2.31	1lol	2.52	1str	12
1fiv	5.14	1gj8	2.31	1jqy	2.1	1k6c	3.09	1hvj	4.1	1f4g	2.2759	1hi3	4.01	1hvi	2.501	1gaf	2.289	1i00	10.19	1f4f	2.22	1lyb	2.94	1sh9	12
1fkn	9.76	1gnm	5.73	1jsv	4.9	1k6p	2.7	1hvk	3.8	1f73	2.0709	1hi4	2.22	1hvj	3.633	1gai	2.323	1i5r	3.39	1fch	4.77	1lzq	4.02	1qhc	12
1fl3	2.03	1gnn	4.86	1k27	4.35	1lyb	2.16	1hvl	2.75	1f74	2.773	1hi5	3.58	1hvk	4.12	1ghv	2.22	1igj	10.752	1fiv	3.51	1m2p	3.66	1pz5	12
1fm9	3.32	1gno	5.42	1kpm	2.04	1lzq	3.9	1hxw	3.61	1fch	11.9208	1hmt	2.2	1hvl	3.661	1ghw	2.085	1iiq	2.212	1fkb	2.27	1m2q	4.04	1phw	12
1fo0	7.49	1gpk	3.63	1kv1	5.18	1m0b	2.14	1i00	3.4	1fhd	3.2421	1hxb	2.19	1hxw	2.992	1gnn	10.863	1ivp	3.911	1fkh	2.44	1m4h	2.87	1n7m	12
1fpc	2.15	1gpn	4.44	1kv5	2.07	1m2p	4.65	1i5r	2.78	1fkb	8.3597	1hxw	6.04	1i00	10.584	1gno	4.068	1izi	2.188	1fkn	5.65	1m5w	2.49	1m4h	12
1fq5	2.41	1gvw	3.93	1l8g	5.14	1m2q	3.67	1iiq	4.09	1fkf	6.9816	1i00	2.24	1i5r	10.886	1gvx	9.092	1j4r	4.866	1fl3	10.49	1mfa	2.04	1lzq	12
1fv0	4.47	1gvx	9.72	1lbk	3.34	1m4h	2.93	1ivp	2.56	1fpc	3.7807	1j4r	3.23	1igj	2.096	1h2t	9.58	1jmi	4.354	1flr	2.45	1mfd	6	1jq8	12
1g2k	5.14	1gx8	2.05	1lol	2.38	1m5w	2.24	1izh	2.74	1fq5	11.1405	1jlr	3.16	1iiq	2.511	1h6h	5.59	1jn4	3.599	1fm9	3.34	1mu6	2.47	1i00	12
1g30	2.31	1h22	3.32	1lyb	2.58	1m7i	2.09	1izi	5.82	1fzq	8.3916	1jmf	3.69	1izh	5.909	1hbv	11.259	1jq8	4.786	1fo0	2.74	1mue	4.97	1hi5	12
1g7g	7.37	1h23	3.01	1lzq	4.17	1mh5	2.59	1j4r	3.85	1g2k	8.797	1jmg	5.6	1izi	2.453	1hi3	4.724	1jvu	4.384	1fpc	2.92	1n5r	2.66	1hi3	12
1g7q	8.79	1h2t	7.56	1m0b	3.5	1moq	2.84	1jmi	2.1	1g30	2.8444	1jmi	3.99	1j4r	3.232	1hi5	4.157	1jyq	5.801	1fq5	3.2	1n7m	7.72	1h2t	12
1g7v	2.68	1hbv	3.27	1m4h	3.31	1n5r	5.32	1jq8	3.62	1g74	6.0304	1jq8	5.38	1jn4	2.828	1hii	3.46	1k6t	2.451	1fv0	5.09	1n8v	2.32	1gvx	12
1g85	2.18	1hi3	4.78	1mh5	2.26	1n7m	3.57	1jqy	3.2	1g7f	6.5549	1jsv	2.53	1jq8	9.571	1hk4	2.498	1k9s	2.148	1g30	2.52	1nh0	2.17	1gnn	12
1gai	2.44	1hi4	3.68	1n7m	3.21	1n8v	2.56	1jyq	2.18	1g7g	7.793	1jvu	3.79	1jqy	2.608	1hmr	3.425	1kzn	3.759	1g32	2.26	1nhu	4.43	1g7v	12
1gi7	2.18	1hi5	4.39	1n8v	2.37	1oar	6.12	1k21	2.39	1g7q	4.3112	1jyq	3.95	1jvu	6.535	1hms	3.344	1l8g	2.131	1g74	2.47	1nja	2.6	1bai	12
1gj8	2.85	1hih	3.91	1nc1	4.79	1odj	3.14	1km3	2.59	1g7v	6.197	1k9s	2.14	1kzn	9.621	1hnn	5.245	1li6	2.776	1g7f	4.62	1njc	2.2	1aid	12
1gjc	2.17	1hos	2.42	1nc3	2.48	1om1	5.26	1kpm	3.16	1gar	9.7715	1kpm	9.03	1lee	4.099	1hpo	4.198	1lkk	4.454	1g7g	2.63	1nw7	7.91	5tmp	11
1gnm	6.9	1hvh	3.97	1nh0	2.11	1owe	2.54	1lkk	2.49	1gjd	6.9714	1kv5	4.09	1lzq	2.198	1hpx	2.168	1lkl	4.175	1g7q	4.8	1o0m	4.94	4mlu	11
1gnn	4.36	1hxw	2.18	1nhu	2.29	1pgp	2.01	1lyb	2.96	1gnm	12.3657	1kzn	3.82	1m4h	2.691	1hvh	2.46	1lyb	2.4	1g7v	5.71	1o0n	4.02	4k55	11
1gno	5.06	1i00	3.1	1nhz	6.1	1phw	3.94	1lzq	3.5	1gnn	5.4707	1lbk	2.23	1m5w	4.304	1hvi	2.67	1lzq	3.655	1g98	2.58	1oe8	8.33	4jx9	11
1gpk	4.87	1i5r	2.98	1njc	2.23	1ppm	3.4	1m0b	3.39	1gno	13.7714	1lf2	2.37	1met	3.998	1hvj	11.96	1m0b	4.384	1gaf	2.44	1om1	4.09	4jwk	11
1gpn	4.61	1iiq	3.47	1njd	2.29	1pyn	2.45	1m4h	2.41	1gvw	11.0402	1lkk	2.98	1mh5	2.337	1hvk	3.405	1m2p	2.384	1gai	2.14	1os5	3.69	4hj2	11
1gvw	5.48	1ik4	2.35	1nl9	2.69	1pz5	5.08	1m7i	2.38	1gvx	9.1442	1lyb	13.71	1n4k	3.028	1hvl	4.36	1m2q	3.664	1gar	5.57	1p19	6.98	4fzj	11
1gvx	9.35	1ivp	3.67	1nny	7.2	1pzo	4.53	1mu6	2.4	1gyx	3.3131	1lyx	4.01	1n5r	5.663	1hxw	2.997	1m2r	4.867	1gnm	3.14	1pgp	2.35	4fys	11
1h22	2.71	1izi	5.65	1nvq	3.63	1q7a	2.8	1mue	2.18	1gyy	4.8494	1m2q	4.95	1n7m	3.065	1i00	9.691	1m48	4.358	1gnn	3.83	1phw	3.94	4ezr	11
1h2t	6.08	1j4r	3.03	1nw5	4.47	1qhc	2.06	1n5r	2.81	1h0a	4.2526	1m7i	2.06	1nh0	3.732	1i5r	5.125	1m4h	2.416	1gno	3.93	1ppk	8.07	4er2	11
1h6h	3.15	1jmi	2.53	1nw7	3.21	1qxk	2.87	1n7m	3.02	1h23	3.3151	1m7y	7.31	1nhu	2.336	1igj	2.269	1mes	5.863	1gvw	5.56	1pxo	6.63	4emr	11
1hbv	2.54	1jq8	3.48	1nz7	2.19	1sh9	3.21	1n8v	2.97	1h2t	3.4623	1mes	4.73	1nt1	2.35	1iiq	3.386	1mh5	2.811	1gvx	5.25	1pz5	5.4	4b9z	11
1hi3	4.37	1jqy	3.35	1o5c	2.11	1sld	2.62	1nh0	2.45	1h6h	2.6334	1met	5.08	1nz7	3.557	1ivp	13.11	1mrw	2.177	1h23	3.01	1pzo	4.25	3v78	11
1hi4	4.44	1jyq	3.31	1odi	4	1str	4.53	1nhu	3.77	1hbv	3.0731	1mh5	2.31	1o0f	3.471	1izh	12.094	1n3z	2.2	1h2t	3.9	1qhc	2.01	3spf	11
1hi5	3.56	1jys	2.5	1phw	3.46	1sv3	4.56	1nja	3.58	1hi3	4.5063	1moq	3.12	1o0m	4.725	1izi	3.366	1n5r	7.686	1h6h	4.59	1r4w	3.85	3rdv	11
1hih	2.31	1k21	2.33	1ppm	4.31	1tcw	2.28	1njs	2.37	1hi4	4.9284	1mu6	2.59	1oz0	2.468	1j4r	2.391	1n7m	2.718	1hi3	2.8	1rd4	2.49	3qx8	11
1hii	3.73	1k6c	2.74	1pr5	3.8	1thz	6	1nl9	2.79	1hi5	5.176	1mu8	2.63	1pgp	2.287	1jmf	4.793	1n8v	2.687	1hi5	3.37	1rnm	4.03	3owj	11
1hos	4.86	1k6p	3.39	1pro	9.22	1u1b	2.35	1nny	2.06	1hih	9.2369	1mue	7.93	1phw	2.929	1jmg	6.43	1nh0	2.019	1hih	2.1	1rpf	2.67	3obx	11
1hps	3.46	1k6t	2.96	1pvn	2.35	1ui0	2.88	1nw5	2.51	1hii	3.6697	1n7m	2.38	1ppl	2.031	1jmi	6.262	1nhu	5.638	1hii	3.87	1sb1	5.83	3o6m	11
1hpx	4.51	1k6v	2.02	1pxn	4.06	1uou	5.32	1nz7	2.33	1hmr	3.345	1nh0	8.35	1ppm	2.376	1jq8	11.359	1nny	3.246	1hms	2.21	1sh9	2.27	3o4k	11
1hsh	2.6	1kpm	6.7	1pyn	2.96	1uwu	2.58	1odj	2.41	1hos	7.9428	1nja	3.36	1pro	4.286	1jqy	2.63	1nw5	3.851	1hmt	4.99	1sqo	6.27	3nw3	11
1hvh	4.04	1kv5	3.31	1pz5	4.12	1w7g	3.11	1ohr	2.49	1hp5	4.2225	1njc	3.28	1pz5	4.762	1jvu	6.599	1nz7	2.472	1hos	4.58	1str	4.86	3n3g	11
1hvi	3.36	1lbk	4.23	1pzo	4.39	1x38	3.43	1onz	2.55	1hpo	6.7729	1njd	3.59	1pzo	3.762	1jyq	2.701	1oau	2.145	1hps	3.63	1tcw	2.04	3m3o	11
1hvj	4.19	1lee	3.04	1pzp	5.72	1xk5	5.49	1oz0	2.31	1hps	8.7729	1nl9	2.14	1q7a	3.709	1jys	2.889	1oba	3.278	1hpx	3.25	1tcx	9.78	3kyq	11
1hvk	3.37	1lf2	6.61	1q84	2.48	1xr8	5.07	1phw	3.79	1hpv	9.1498	1nm6	7.96	1qhc	3.274	1k6t	3.608	1od8	5.876	1hsh	4.78	1thz	10.17	3hit	11
1hvl	4.85	1li6	2.95	1qan	3.75	1xr9	3.17	1ppk	2.11	1hpx	2.4093	1nny	2.81	1qxk	2.87	1kav	2.593	1onz	4.018	1hvh	2.43	1u0g	3.04	3h8b	11
1hvs	4.88	1lkk	3.18	1qbu	10.26	1zc9	2.88	1ppl	3.81	1hsh	10.8281	1no6	2.87	1rnm	4.564	1kjr	3.965	1owh	2.421	1hvi	5.42	1ur9	6.74	3gus	11
1hxb	4.12	1lkl	4.67	1qbv	4.14	1zea	6.51	1ppm	3.44	1hvh	13.2913	1np0	4.68	1sb1	2.215	1koj	2.003	1oz0	5.63	1hvk	3.15	1uwu	2.18	3gdt	11
1hxw	5.83	1lyb	2.88	1qhc	2.42	1zog	3.07	1pro	2.58	1hvi	9.4506	1nw4	2.71	1sbg	3.439	1kpm	7.267	1phw	4.85	1hvl	4.12	1w4q	2.48	3g2z	11
1i00	3.8	1lzq	4.09	1qk3	5	1zpa	2.46	1pyn	3.2	1hvj	9.264	1nz7	3.38	1sdu	3.986	1kzn	10.679	1pot	6.33	1hvs	3.43	1w5v	2.73	3dxh	11
1i5r	4.24	1m0b	4.04	1r0p	4.23	2a5b	2.02	1pz5	4.93	1hvk	10.1782	1o0f	2.95	1sdv	2.633	1li3	3.143	1ppk	3.329	1hxb	4.22	1w5x	2.47	3drg	11
1iiq	4.95	1m0o	2.9	1rd4	2.76	2ans	3.7	1q7a	2.3	1hvl	9.6805	1oar	6.13	1sgu	4.468	1lkk	2.12	1ppl	2.251	1hxw	2.84	1w7g	3.63	3d8z	11
1ivp	7.49	1m2p	4.85	1rnt	3.87	2aoc	3.09	1qhc	3.43	1hvs	13.5084	1oba	3.86	1sh9	3.84	1lnm	2.572	1ppm	4.826	1i00	4.58	1w9u	4.07	3d7b	11
1izh	8.71	1m2q	3.72	1sb1	4.65	2aod	2.68	1qxk	2.15	1hwr	7.3	1ogd	2.96	1sqt	2.665	1lol	2.474	1pxo	2.32	1i5r	2.48	1w9v	5.7	3d6q	11
1izi	8.12	1m5w	2.3	1sh9	4.71	2aoe	2.56	1r4w	2.3	1hxb	10.7206	1ogg	4.53	1str	4.499	1lyb	2.413	1pyn	3.023	1iiq	3.82	1xgi	2.97	3d6o	11
1j4r	3.37	1m7i	2.33	1str	5.97	2aog	2.31	1rnm	2.88	1i00	9.8265	1om1	5.32	1sv3	2.113	1lzq	5.766	1pz5	4.67	1ivp	2.78	1xk5	5.47	3ckp	11
1jlr	7.38	1mh5	3.18	1sv3	2.37	2aqu	2.21	1s5z	2.09	1i5r	7.0626	1onz	2.64	1swg	2.26	1m0b	2.541	1pzo	4.522	1izh	2.07	1xkk	2.19	3c2f	11
1jmi	2.1	1n5r	5.3	1tcw	2.33	2arm	4.27	1sgu	2.28	1iiq	10.9032	1oz0	2.51	1t7j	4.284	1m2q	4.919	1q7a	4.836	1izi	3.12	1xws	3.31	3bze	11
1jn4	4.79	1n7m	2.67	1thz	6.23	2avm	2.31	1sh9	2.69	1ivp	10.0245	1pgp	5.79	1tcw	2.838	1m2r	4.853	1q84	3.6	1j4r	6.12	1z1h	9.32	3bf1	11
1jq8	3.65	1nc3	2.41	1tsy	3	2avo	2.03	1sl3	3.46	1izh	13.0783	1phw	4.98	1thz	2.533	1m4h	2.299	1qhc	2.752	1jev	6.2	1zc9	2.75	3b7j	11
1jqy	2.64	1nhu	3.56	1u1b	6.31	2avs	3.38	1str	5.18	1izi	7.6282	1ppk	4.9	1u1b	3.278	1m5w	4.683	1rd4	2.676	1jlr	2.07	1zea	5.77	3b3x	11
1jsv	4.8	1nhz	5.94	1uj5	2.06	2avv	2.63	1t7j	2.15	1j4r	3.0425	1ppl	6.79	1ur9	5.361	1m7y	5.095	1rnm	5.039	1jmi	2.2	1zog	3.31	3ary	11
1jyq	3.77	1nja	3.18	1uwt	3.38	2b7d	3.4	1ta6	3.48	1jgl	6.1269	1ppm	3.96	1uwt	2.863	1mes	5.556	1rpf	3.791	1jq8	3.35	1zp8	3.75	3arq	11
1jys	2.49	1njc	2.26	1uwu	3.71	2b9a	6.6	1u1b	4.12	1jmf	2.3498	1pvn	2.79	1uz1	2.4	1mfa	2.016	1sbg	3.592	1jqy	4.49	2a5b	2.07	3arp	11
1k27	4.46	1njs	6.88	1w4o	2.63	2bo4	2.83	1ua4	2.21	1jq8	6.2983	1pxo	3.04	1w3j	2.04	1mfd	5.683	1sh9	2.244	1jyq	3.11	2a8g	2.86	3ai8	11
1k6c	3.88	1nl9	2.99	1w4q	2.68	2bvr	6.73	1w11	2.14	1jqy	2.1731	1pyn	2.65	1w4o	2.265	1mh5	2.61	1siv	2.222	1jys	2.6	2ans	3.71	2wec	11
1k6p	3.27	1nm6	6.94	1w9v	2.18	2bvs	6.55	1w4q	2.05	1k21	6.0228	1pz5	4.23	1w5v	4.358	1moq	2.434	1sl3	3.532	1k21	4.03	2arm	5.6	2v2v	11
1k6t	2.09	1nvq	3.36	1x39	2.08	2c3i	4.92	1w5v	2.4	1km3	2.1365	1pzo	4.74	1w5w	2.388	1n5r	7.622	1str	3.174	1k22	3.13	2b07	2.1	2r0z	11
1k6v	3.28	1nw4	2.06	1xk5	4.89	2ce9	5.62	1w5w	2.42	1kpm	14.2548	1q7a	5.16	1w5x	2.654	1n7m	7.214	1sv3	2.286	1k6c	2.12	2b9a	2.53	2qm9	11
1kpm	3.05	1nw5	2.14	1xkk	2.58	2cen	2.24	1w5x	2.71	1kv1	3.6846	1qan	3.07	1w5y	4.375	1n8v	2.752	1t7d	3.055	1k6p	3.8	2bmk	5.67	2q8h	11
1kv1	6.36	1o0f	4.2	1xr8	2.22	2ces	3.4	1w5y	2.61	1kzn	3.5866	1qbv	7.76	1w7g	5.523	1nh0	3.939	1tcw	4.655	1k6t	2.68	2bqv	6.64	2q7y	11
1kv5	3.5	1oba	3.39	1y6r	5.04	2cet	2.93	1w7g	3.32	1lbf	3.7503	1qhc	2.56	1w9u	3.29	1nhu	4.308	1thz	3.214	1k6v	3.43	2br1	6.48	2pmk	11
1lf2	6.87	1oe8	6.17	1yc1	4.85	2e7l	2.03	1w9u	2.28	1lbk	6.1145	1qxk	3.43	1w9v	2.997	1njd	2.258	1u1b	2.341	1kpm	4.46	2bvr	7.48	2p3b	11
1li6	2.94	1os5	2.47	1yc4	4.15	2er6	2.69	1w9v	2.01	1lee	3.5755	1r4w	4.27	1xk5	4.891	1nw4	2.267	1uwt	3.429	1kzk	2.96	2bvs	3.6	2p3a	11
1lkk	2.05	1oz0	4.45	1zc9	2.82	2euk	3.52	1xk5	6.05	1lf2	3.2146	1rpf	2.3	1xr8	6.105	1nz7	5.207	1uwu	3.405	1kzn	5.04	2c1p	4.72	2oxy	11
1lkl	4.64	1pgp	2.06	1zea	4.99	2eum	4.82	1xkk	2.39	1lyb	8.4369	1s89	4.2	1xr9	6.719	1o0f	3.313	1w4q	5.594	1lbk	4.51	2c80	8.74	2i4j	11
1lyb	6.33	1phw	5.29	1zpa	5.53	2evl	5.67	1xr8	6.6	1lzq	11.4531	1sdt	5.16	1xws	2.423	1o0m	4.852	1w9v	3.753	1lkk	3.87	2c97	2.15	2gv6	11
1lyx	3.21	1pkx	6.4	2a14	3.81	2fle	2.34	1xr9	4.68	1m0b	3.724	1sdu	3.68	1yet	4.471	1odj	2.684	1x38	3.445	1lkl	4.31	2ce9	6.37	2evl	11
1lzq	7.19	1ppk	7.59	2a4m	2.82	2fmb	2.96	1ydk	2.35	1m2q	2.0263	1sh9	8.09	1z6s	3.247	1oe8	6.501	1x39	5.644	1lol	2.23	2cen	3.57	2cen	11
1m0b	6.31	1ppl	7.49	2aoc	3.7	2g8r	5.85	1z1h	2.02	1m2r	4.2496	1sl3	7.95	1z71	2.892	1ogz	2.65	1x8t	2.476	1lyb	3.76	2cgr	2.22	2b7d	11
1m2p	6.21	1ppm	5.83	2arm	2.77	2g94	2.64	1z71	2.7	1m5w	2.6202	1sqo	5.78	1zc9	2.703	1om1	3.172	1xgi	6.147	1lzq	2.18	2csn	3.09	2aoc	11
1m2q	3.69	1pxo	2.6	2avq	3.48	2gj5	2.93	1zc9	4.79	1m7y	7.3785	1str	3.14	1zea	5.755	1onz	2.6	1xk5	5.906	1m0b	3.47	2er6	2.2	1zc9	11
1m5w	2.16	1pxp	4.83	2avv	5.62	2gv6	4.14	1zea	4.48	1mai	4.1466	1sv3	4.7	1zp8	4.443	1os5	3.642	1xk9	3.604	1m2p	5.04	2euk	2.18	1xr8	11
1m7i	2.74	1pz5	4.89	2ayr	7.4	2gv7	3.9	1zoe	2.61	1mes	11.4935	1tcw	2.36	1zpa	4.52	1pgp	2.486	1xkk	2.866	1m2q	3.94	2eum	4.48	1xk5	11
1mh5	2.62	1pzi	2.97	2b07	2.61	2ha2	2.22	1zp8	3.48	1met	13.1902	1thz	3.2	2a5b	5.93	1phw	5.259	1xr8	5.788	1m2r	3.7	2evl	2.13	1u1b	11
1moq	2.12	1pzp	5.68	2b1i	7.72	2ha5	2.31	1zpa	2.19	1mfd	4.5511	1tsy	2.53	2a8g	2.745	1ppl	2.096	1xr9	4.365	1m4h	12.39	2flr	2.75	1tcw	11
1n3i	3.21	1q7a	4.25	2b7d	7.11	2ha6	2.39	2a4m	2.42	1mh5	3.8738	1tys	3.59	2aoc	3.082	1pr5	2.137	1xws	2.188	1m7d	5.01	2g8r	6.49	1lyb	11
1n3z	2.19	1q84	4.94	2bak	4.41	2hah	3.02	2a5b	2.1	1msn	12.0503	1u1b	2.45	2aod	12.426	1pro	3.947	1z71	5.265	1m7i	3.16	2gj5	3.38	1hbv	11
1n5r	5.89	1qhc	4.48	2bfq	6.05	2hkf	2.42	2a8g	2.21	1mu8	3.2327	1u1w	2.83	2aoe	5.264	1pvn	5.565	1zc9	2.767	1mes	2.43	2glp	2.62	1h6h	11
1n7m	2.83	1qxk	4.22	2brb	4.12	2i2c	5.38	2aoc	3.39	1n4h	2.1202	1uwt	3.23	2aog	9.027	1pz5	6.043	1zea	4.947	1met	2.13	2gss	2.72	1gno	11
1n8v	4.17	1r0p	4.38	2brm	4.44	2i4j	2.76	2aod	3.26	1n8v	7.3945	1uwu	3.7	2aqu	5.229	1pzo	4.053	1zgi	3.345	1mfa	4.46	2gv6	2.64	1g7q	11
1nc1	4.85	1rnm	2.02	2bvr	5.24	2itk	2.32	2aoe	3.15	1nh0	4.7278	1uz1	3.48	2arm	3.573	1pzp	8.515	1zog	3.285	1mfd	2.14	2gz2	3.19	1fo0	11
1nc3	2.39	1rnt	2.38	2bvs	3.97	2j77	2.37	2aog	4.52	1nhu	5.0725	1uz4	2.96	2avm	8.908	1q1g	2.831	1zoh	4.977	1mh5	3.56	2hhn	2.06	1fkn	11
1nh0	5.21	1rpf	2.42	2c3l	3.64	2j7b	3.39	2aqu	3.4	1nhz	12.2203	1vso	5.02	2avo	4.141	1q7a	3.908	1zp8	3.026	1mrx	2.35	2hkf	3.98	1fch	11
1nhu	2.61	1sb1	2.75	2c80	2.34	2nn8	3.19	2arm	3.21	1nja	3.9961	1w13	2.12	2avq	10.158	1qhc	2.201	1zpa	3.726	1msm	4.02	2i0a	3.52	1e3v	11
1nhz	6.11	1sdu	2.11	2ca8	4.32	2o1c	4.11	2avm	3.2	1njc	2.8098	1w4p	3.92	2avs	3.978	1r4w	2.136	2a5b	5.937	1mue	2.75	2ieo	4.96	1dif	11
1nja	2.61	1sdv	2.51	2ce9	5.36	2ot1	4.69	2avo	3.55	1nl9	3.9694	1w4q	3.01	2avv	2.014	1r6n	6.49	2a8g	2.916	1n0s	4.22	2nn8	5.74	1bxq	11
1nl9	3.11	1sh9	4.42	2cen	8.16	2oxd	3.03	2avq	3.36	1nny	7.3112	1w7g	5.08	2b7d	4.547	1rnm	4	2ans	3.859	1n5r	4.69	2o1c	5.88	1a30	11
1nny	3.84	1siv	2.94	2ceq	3.4	2oxy	3.79	2b07	2.38	1no6	2.0108	1w9u	7.66	2b9a	2.187	1s5z	4.306	2aoc	2.391	1n7m	2.02	2oag	3.19	5er2	10
1nvq	3.35	1str	4.63	2cer	2.96	2p3a	2.37	2b7d	2.39	1nt1	3.5157	1x38	2.93	2bak	3.157	1s89	2.718	2aod	3.083	1n8v	4.41	2ole	3.98	4np9	10
1nw4	2.13	1sv3	4.79	2ces	3.79	2p3b	2.35	2b9a	2.62	1o0f	7.345	1x39	2.94	2bo4	2.453	1sb1	6.744	2aoe	3.826	1nh0	5.6	2ot1	5.77	4ieh	10
1nw5	4.06	1t4v	2.93	2cet	3.26	2p3c	2.33	2bo4	2.03	1o0h	8.3111	1x8t	2.34	2bqv	5.276	1sdu	3.817	2aog	3.967	1nhu	4.55	2oxd	3.36	4i8n	10
1nw7	4.86	1tcw	2.76	2d0k	4.27	2p4j	2.3	2bpv	3.45	1o0n	2.0471	1xk5	3.6	2brm	4.209	1sgu	11.118	2arm	4.856	1nl9	4.07	2oxn	3.54	4emf	10
1nz7	3.8	1thz	5.95	2e5y	6.22	2p95	2.07	2bpy	3.78	1oe8	7.0501	1xk9	6.17	2bvr	5.802	1sh9	3.497	2avm	3.346	1nny	3.43	2oxy	2.69	3upv	10
1o5b	3.24	1tpw	2.68	2epn	3.28	2pk6	2.23	2bqv	2.08	1ogg	6.7102	1xr8	9	2bvs	6.219	1srg	6.783	2avq	2.353	1no6	3.31	2p95	2.35	3ug2	10
1odi	4.82	1trd	2.92	2er6	11	2pmk	3.31	2bvr	2.46	1ohr	3.985	1xr9	4.51	2cbj	3.981	1str	8.711	2avs	3.713	1nw5	4.15	2pk6	5.52	3t6b	10
1ogg	4.76	1tsy	2.35	2euk	4.5	2pu2	3.69	2bvs	4.27	1ony	2.5828	1z6s	3.05	2ce9	3.053	1t32	2.602	2avv	3.96	1nw7	4.35	2pmk	2.56	3rt4	10
1ogx	6.16	1u1b	3.32	2eum	6.98	2pv1	3.25	2c80	2.07	1p19	3.5929	1z71	7.48	2cej	2.278	1t7j	4.94	2b07	2.271	1nz7	3.1	2psu	2.35	3qqa	10
1ogz	2.97	1uvt	2.35	2evl	4.94	2q6f	4.28	2ca8	2.96	1p1n	4.0283	1zc9	2.64	2cen	2.019	1tcw	7.563	2b7d	3.048	1oau	2.48	2psv	2.06	3q6z	10
1ohr	2.36	1uwu	3.29	2ewa	6.18	2q7y	3.73	2ce9	5.49	1pa9	3.6238	1zea	4.91	2cer	3.662	1tcx	3.608	2b9a	6.717	1odj	2.29	2pu2	2.83	3ppm	10
1os5	2.84	1w4o	2.48	2f81	2.05	2q8h	3	2cej	2.01	1phw	4.7581	1zgi	8.04	2e2p	2.177	1thz	10.047	2bo4	2.166	1ohr	2.09	2q7y	2.92	3p9t	10
1owe	2.7	1w4q	3.59	2fqw	4.21	2qbw	2.81	2cen	2.08	1ppk	7.0906	1zp8	5.01	2e5y	2.171	1tsy	7.921	2bpy	2.388	1ony	4.02	2qbp	2.14	3p9m	10
1oz0	4.41	1w7g	3.92	2fqy	3.77	2qg0	2.47	2e7l	3.01	1ppl	7.5708	1zpa	11.45	2e7l	2.456	1u1b	9.134	2bvr	7.762	1onz	2.8	2qd8	4.12	3o5n	10
1phw	4.37	1w9v	3.18	2fvd	2.6	2qhd	4.11	2er6	4.31	1ppm	9.2166	2a4m	4.6	2er6	7.253	1ui0	2.865	2bvs	7.598	1os5	2.97	2qhd	2.23	3nsn	10
1ppk	3.26	1x39	2.12	2fxs	5.34	2qm9	4.51	2euk	11.74	1pro	11.3221	2a5b	2.1	2euk	5.834	1upf	3.054	2c3i	4.95	1oz0	6.42	2qi0	5.33	3mam	10
1ppl	4.57	1xk5	5.01	2fxv	4.14	2qmj	2.51	2eum	3.34	1pvn	6.2696	2a5s	3.35	2eum	8.133	1ur9	5.403	2c97	2.125	1p19	2.21	2qi3	3.81	3m3e	10
1ppm	5.17	1xk9	3.44	2g8r	5.54	2r0z	5.18	2evl	3.74	1pxn	6.3087	2a8g	6.03	2evl	9.644	1uwt	3.524	2ce9	6.557	1phw	3.73	2qi5	3.67	3kku	10
1pr5	4.9	1xkk	7.3	2gj5	3.14	2r2m	2.55	2fle	2.58	1pxo	7.0224	2aj8	5.45	2f80	3.905	1uwu	2.881	2ceq	3.39	1ppk	4.12	2qi7	2.42	3jzg	10
1pxn	4.45	1xr9	6.38	2gl0	4.62	2r9w	3.88	2fmb	2.98	1pxp	4.3663	2ans	2.68	2f81	2.848	1vyg	2.864	2cer	3.212	1ppl	5.58	2qm9	4.67	3iss	10
1pxo	2.38	1ydk	4.04	2glp	3.86	2r9x	4.3	2g8r	2.03	1pz5	8.0068	2arm	5.46	2fdp	5.698	1w3j	2.281	2ces	3.361	1pxn	2.76	2qpq	2.08	3hv8	10
1pyn	3.54	1z3v	2.01	2gv6	5.45	2v2q	4.22	2gj5	3.88	1pzi	3.5403	2avo	4.06	2fle	5.373	1w4o	7.587	2cet	4.109	1pxo	3.89	2r9w	2.06	3gr2	10
1pz5	5.2	1z71	3.22	2h21	3.36	2v2v	2.36	2gss	2.37	1pzo	5.092	2avs	2.53	2g8r	6.103	1w4q	7.823	2cgr	3.552	1pz5	7.93	2uxi	7.14	3g32	10
1pzi	3.07	1zc9	2.66	2hkf	2.09	2vmf	2.57	2gv6	2.31	1q7a	3.6117	2avv	2.47	2g94	3.146	1w5w	5.933	2e2p	2.077	1pzi	4.02	2uyq	2.09	3ery	10
1pzo	2.81	1zea	4.69	2hmu	5.07	2vot	2.77	2gv7	3.24	1qbr	12.074	2b7d	3.99	2gj5	2.863	1w5x	5.919	2e5y	3.224	1pzo	2.77	2v2q	6.64	3dsz	10
1pzp	5.97	1zoe	3.69	2i4j	2.35	2w5g	3.35	2gz2	2.18	1qbt	10.5487	2b9a	6.59	2glp	2.749	1w5y	2.021	2e7l	2.407	1pzp	2.08	2v2v	4.29	3d8y	10
1q7a	2.11	1zp8	3.27	2i4z	6.64	2wbg	2.13	2ha5	2.16	1qbv	2.6224	2bak	3.25	2gst	2.802	1w7g	6.418	2er6	2.145	1q1g	2.09	2vba	2.1	3d6p	10
1q84	2.87	1zpa	3.27	2ihj	2.1	2wc3	2.08	2hkf	3.89	1qhc	2.2624	2bal	3.42	2gv6	6.787	1w9u	3.812	2euk	4.994	1q84	4.12	2vfk	3.75	3bzf	10
1qan	4.65	2a5b	3.55	2ihq	3.82	2wc4	2.42	2hmu	3.01	1qxk	2.1484	2bmk	5.22	2gv7	4.751	1w9v	2.958	2eum	5.803	1qbr	2.56	2vhj	2.95	3bva	10
1qbr	2.33	2a5c	3	2itk	3.98	2wec	3.4	2hmv	3.29	1rnm	2.9675	2bo4	4.87	2ha5	2.397	1x39	3.141	2evl	8.523	1qbt	3.24	2vot	2.71	3adv	10
1qbt	5.32	2ans	4.31	2j79	3.46	2wk6	5.06	2hs2	2.06	1s5z	2.4406	2bpy	12.09	2ha6	3.451	1x8d	2.701	2f1g	2.003	1qbu	2.68	2vwm	6.84	2yim	10
1qbv	4.06	2aoc	2.96	2j7b	3.67	2wkz	2.02	2hxm	2.77	1sb1	4.7338	2bqv	8.8	2hkf	4.329	1xkk	3.104	2f81	4.067	1qhc	2.13	2w5g	3.14	2xog	10
1qhc	2.54	2aoe	3.79	2j7d	4.01	2wnc	2.15	2i2c	3.47	1sbg	3.5248	2bvr	2.42	2i0a	2.153	1xr8	4.16	2fle	3.66	1qk3	2.83	2w9h	2.01	2vot	10
1qk3	4.23	2aog	3.06	2j7e	2.85	2xdk	2.4	2i4d	2.41	1sdt	11.2817	2bvs	2.43	2i2c	5.349	1xr9	2.04	2fmb	3.44	1qk4	3	2wec	5.59	2vhj	10
1qxk	2.66	2arm	5.16	2j7f	3.82	2xdx	3.81	2i4j	2.07	1sdv	10.9488	2c80	2.55	2i4j	3.715	1xws	2.09	2fqy	2.067	1qxk	3.98	2wk6	2.88	2qmj	10
1r0p	4.46	2avq	5.31	2j7g	3.13	2xog	6.06	2i4w	2.75	1sgu	2.4097	2c92	2.19	2i4u	3.265	1yet	4.295	2g8r	6.771	1r4w	2.77	2wn9	6.44	2qbw	10
1r4w	3.17	2avv	2.19	2jgs	2.95	2xyf	2.34	2i4x	3.02	1sh9	4.4663	2ca8	2.98	2i4v	3.134	1z3v	6.154	2gj5	3.986	1rd4	3.59	2wnj	4.19	2q6f	10
1rnt	4.44	2b1g	5.02	2jiw	4.22	2y8c	2.98	2i4z	3.17	1siv	11.6236	2cbu	4.43	2i4w	3.29	1z6s	7.776	2glp	3.18	1rnm	3.4	2wuf	2.16	2pv1	10
1rpf	2.03	2b1i	6.77	2nt7	4.9	2yim	2.33	2ieo	2.49	1sld	5.8825	2ce9	5.88	2i4x	3.506	1zc9	2.382	2gss	2.483	1rpf	2.32	2x6x	2.62	2p3c	10
1rtf	2.6	2b7d	4.16	2o0u	2.68	2yxj	3.3	2j7b	2.61	1srg	6.4137	2ceq	3.36	2i4z	5.408	1zea	6.361	2gv6	4.842	1sb1	2.19	2xdk	2.8	2j7b	10
1s5z	2.2	2b9a	6.65	2o1c	2.52	3aaq	2.62	2nn8	2.43	1str	5.8687	2cer	2.74	2ieo	4.025	1zoe	3.661	2gv7	5.797	1sdv	4.35	2xdx	2.34	2i4z	10
1sb1	5	2bfq	2.47	2o4k	6.41	3adv	4.09	2nsj	6.85	1sv3	4.3958	2ces	3.41	2itk	5.472	1zog	3.697	2gz2	2.411	1sgu	3.57	2xog	3.13	2gv7	10
1sbg	2.23	2bmk	4.51	2oag	2.15	3ai8	3.45	2o4n	2.11	1t32	3.5628	2cet	2.99	2j77	2.237	1zp8	10.399	2ha5	3.09	1sh9	4.23	2y5f	8.19	2glp	10
1sdt	2.27	2bo4	2.68	2ole	3.8	3arp	5.8	2ot1	2.26	1t4v	6.9958	2e5y	2.12	2j7b	2.84	2a5b	6.032	2hah	2.798	1siv	2.53	2y7p	2.11	2bo4	10
1sdu	2.52	2bpv	6.44	2on6	4.21	3arq	3.32	2oxd	3.29	1t7d	6.0255	2eum	4.38	2j7d	4.29	2a8g	2.711	2hkf	4.319	1sl3	4.53	2ybu	4.31	2b9a	10
1sdv	2.36	2bpy	8.2	2ot1	4.22	3aru	3.58	2oxx	3.35	1tcw	8.8137	2evl	4.56	2jg0	2.013	2aoc	14.469	2i0a	2.156	1sqo	4.29	2ylc	6.44	2avq	10
1sgu	3.22	2br1	3.95	2ov4	2.09	3arv	5.8	2oxy	3.75	1thz	5.4528	2f34	5.41	2nmz	2.674	2aod	6.015	2i4j	2.247	1srg	2.62	2zz2	2.01	2aog	10
1sh9	5.26	2brb	4.02	2oxn	3.78	3arw	5.44	2p3a	2.35	1tsy	2.464	2f35	5.51	2o1c	3.626	2aoe	6.289	2i4w	2.325	1str	5.14	3aaq	2.25	2aoe	10
1siv	3	2brm	4.26	2oxx	2.39	3arx	2.13	2p3b	3.8	1u1b	10.3884	2fdp	2.22	2o4n	2.092	2aog	12.086	2i4x	2.27	1swg	2.43	3adv	3.65	2a5b	10
1str	6.05	2bvr	4.96	2oxy	2.32	3ary	4.18	2p3c	2.94	1u1w	2.8467	2fgu	2.14	2o4s	5.421	2arm	4.508	2i4z	5.882	1t32	5.09	3ai8	3.22	1zp8	10
1sv3	4.78	2bvs	2.84	2p2a	2.43	3b3x	2.35	2p4j	2.25	1u71	2.8196	2fqy	2.06	2ot1	6.209	2avm	13.446	2ieo	3.556	1ta6	4.96	3ap4	3.01	1xr9	10
1swg	2.24	2c3i	2.84	2p3a	3.84	3b5j	2.99	2p95	2.85	1ua4	3.1793	2fxs	2.04	2ov4	2.24	2avq	12.854	2ihq	2.132	1tcw	3.94	3arp	3.82	1w9v	10
1t7d	2.09	2c80	4.06	2p3b	3.44	3b7j	3.92	2pk6	2.76	1ui0	2.6832	2g8r	7.09	2oxy	2.537	2avv	10.724	2iuz	2.563	1tpw	2.8	3arq	8.73	1w7g	10
1t7j	3.95	2c92	3.05	2p3c	2.99	3bbb	5.95	2pmk	2.26	1uwt	4.1886	2g94	4.4	2p3a	5.758	2b07	2.193	2j77	2.489	1tsy	2.43	3arr	2.6	1thz	10
1tcw	4.47	2cbj	3.98	2p4j	6.04	3bf1	2.67	2pqz	4.51	1uwu	3.4188	2gj5	2.95	2p3b	8.256	2b7d	4.861	2j79	3.704	1u1b	3.44	3arw	3.21	1pzo	10
1thz	6	2ce9	3.16	2p95	5.87	3bgb	2.04	2psv	3.48	1vyg	2.854	2glp	2.64	2p3c	5.593	2b9a	2.752	2j7b	3.323	1ui0	3.52	3ary	6.69	1nhu	10
1tpw	3.29	2cej	2.05	2pk5	3.58	3bgc	2.18	2pv1	4.13	1w0z	3.6363	2gv7	5.58	2p4j	6.694	2bal	4.569	2j7d	3.126	1uwt	2.95	3b2q	8.02	1nh0	10
1trd	3.31	2cen	7.14	2pk6	2.1	3buf	2.04	2pwc	4.64	1w13	8.0372	2ha3	2.77	2pk5	10.267	2bfq	2.216	2j7e	3.012	1vyf	2.17	3b3x	2.43	1mh5	10
1u1b	6.06	2ceq	3.38	2pmk	5.84	3bv9	3	2pwr	2.97	1w4q	3.8444	2hhn	2.37	2pmk	3.041	2bo4	3.015	2j7f	5.318	1w5w	4.42	3b5j	2.02	1m0b	10
1ur9	2.12	2cer	3.41	2pu2	2.35	3bva	2.03	2q5k	3.45	1w5v	5.002	2hjb	2.62	2pu2	3.966	2bpv	3.906	2j7g	3.102	1w5x	2.35	3b7j	4.38	1j4r	10
1uw6	4.8	2ces	3.37	2q6f	3.36	3bze	3.59	2q63	2.39	1w5w	12.3714	2hkf	3.83	2pv1	4.561	2bpy	12.793	2jg0	2.903	1w7g	2.09	3bbb	5.18	1izi	10
1uwu	3.32	2cet	4.11	2q7y	2.77	3bzf	5.36	2q6f	2.03	1w5x	7.093	2hmu	2.05	2pwr	4.594	2brm	4.147	2jiw	4.356	1w9u	5.88	3bf1	3.35	1ivp	10
1uz8	2.06	2csn	2.1	2q8h	2.06	3c2f	3.36	2q7y	2.62	1w5y	7.516	2hzl	2.76	2q54	4.101	2bvr	5.078	2o0u	2.759	1w9v	4.64	3bqc	4	1i5r	10
1w3l	2.99	2e7l	2.68	2qbu	6	3cdb	3.8	2q8h	2.65	1w7g	6.1686	2i2c	3.12	2q55	3.282	2bvs	5.018	2o4l	3.034	1wdn	4.42	3bra	3.43	1fiv	10
1w4o	2.6	2er6	7.59	2qbw	2.41	3cf8	2.78	2qbw	3.2	1w9u	2.1768	2i4j	2.62	2q7y	2.692	2c1p	5.46	2o4n	3.233	1x1z	2.04	3buf	4.16	1cet	10
1w4q	3.76	2ewa	5.74	2qi3	3.53	3ckp	3.05	2qd6	2.53	1w9v	7.2308	2i4w	2.11	2q8h	2.354	2c3i	4.98	2oag	2.155	1x8r	3.25	3bv9	3.59	1adl	10
1w5v	2.79	2f1g	3.59	2qm9	3.87	3coy	2.12	2qd7	2.25	1wdn	4.5906	2i4x	2.11	2qbw	3.567	2c80	2.02	2ole	6.883	1xgi	3.22	3bzf	3.18	5er1	9
1w5w	2.49	2f34	2.61	2qmj	3.93	3d7b	2.11	2qfo	2.57	1wht	2.0095	2i4z	5.78	2qci	3.056	2c97	2.399	2ot1	2.934	1xk5	4.99	3c2f	5.22	4tmk	9
1w5x	4.8	2f35	3.05	2qrk	6.08	3d8z	2.35	2qhz	2.64	1x39	2.9316	2itk	3.25	2qd8	2.12	2cbj	4.464	2ov4	2.051	1xk9	2.16	3c8e	5.59	4ezz	9
1w5y	4.21	2fmb	4.56	2qtg	4.29	3djq	3.93	2qi0	2.02	1x8d	2.5056	2j77	2.83	2qhd	4.879	2cbu	2.65	2oxd	4.212	1xkk	2.95	3cf8	4.97	4eu0	9
1w7g	3.79	2fvd	2.52	2qtt	2.59	3djx	2.86	2qi1	2.5	1x8t	2.5483	2j79	3.27	2qhy	3.593	2ce9	3.815	2oxn	4.959	1xr8	4.73	3cfn	5.67	4er1	9
1w9u	5.73	2fxs	2.21	2r0h	4.04	3drf	2.13	2qi3	3.37	1xgi	2.2266	2j7b	2.84	2qhz	3.851	2cen	8.614	2oxx	4.131	1xr9	3.5	3ckp	2.08	4dew	9
1w9v	3.07	2g8r	3.11	2r0z	5.35	3drg	3.74	2qi5	3.44	1xk5	3.5994	2j7d	3.07	2qi3	3.623	2ceq	2.923	2oxy	3.843	1xws	4	3cyw	2.61	4det	9
1x38	3.42	2g94	4.6	2r5a	2.23	3dri	3.79	2qi6	2.15	1xkk	2.7094	2j7e	3.07	2qi4	3.489	2cer	5.923	2p3a	3.823	1yc1	3.21	3d6o	2.83	4des	9
1x8d	3.18	2gj5	3.21	2r9x	4.18	3dsz	2.53	2qi7	2.7	1xr8	8.6458	2j7f	3.17	2qi5	2.063	2ces	3.802	2p3b	3.235	1ydk	3.13	3d6p	4.76	4br3	9
1xk5	4.85	2glp	3.91	2uwo	2.09	3dxg	2.68	2qm9	2.48	1xr9	7.2435	2j7g	2.59	2qi6	3.794	2cet	3.93	2p3c	2.216	1z3v	3.29	3d6q	4.24	3vtr	9
1xk9	3.18	2gss	4.86	2uy4	3.42	3dxh	3.43	2qmj	4.55	1xws	2.1163	2jiw	3.96	2r0h	7.836	2d0k	3.556	2p95	2.238	1z71	3	3d7b	4.43	3v4t	9
1xkk	2.99	2gst	4.19	2uyq	2.46	3e85	3.55	2qnp	2.53	1z1h	3.1889	2jxr	3.02	2r0z	8.966	2e5y	2.378	2pgz	4.623	1zc9	3.09	3d8y	4.68	3tmk	9
1xr9	7.15	2gv6	5.22	2v2q	5.44	3eax	7.8	2qnq	4.75	1z6s	6.5448	2nn8	6.01	2r5p	2.027	2er6	8.705	2pk5	3.102	1zea	5.21	3d8z	4.15	3slz	9
1y6r	4.8	2gv7	5.28	2v2v	5.2	3eb1	4.26	2r0z	3.99	1zea	8.6844	2o4l	2.28	2rkf	3.782	2euk	6.583	2pk6	3.512	1zgi	2.98	3djo	4.66	3qx9	9
1yc1	4.83	2gz2	2.02	2v8w	4.03	3ed0	5.42	2r5p	2.49	1zoe	4.6182	2o4n	2.38	2rkg	5.787	2eum	9.386	2pmk	2.739	1zog	2.71	3djp	4.28	3qkd	9
1yc4	4.38	2h21	3.72	2vfk	2.69	3ery	4.13	2r9w	2.62	1zoh	5.1035	2ot1	3.2	2uxz	3.586	2f81	2.039	2pu2	3.724	1zoh	2.91	3djq	5.69	3qfy	9
1ydk	2.1	2ha2	2.51	2vhj	3.71	3f8f	4.36	2r9x	3.77	1zp8	6.4706	2oxy	2.34	2uy0	3.875	2fdp	2.272	2pv1	3.014	1zp8	4.04	3djx	4.81	3prs	9
1z71	3.49	2ha5	2.49	2vmf	2.74	3fv3	2.79	2rkf	3.88	2a8g	3.0889	2p4j	5.84	2uy3	2.829	2fle	11.996	2q54	2.057	1zpa	5.24	3drf	4.82	3obu	9
1zc9	2.6	2ha6	2.02	2vot	2.84	3fvh	4.45	2rkg	2.07	2ans	3.1954	2p95	2.85	2v2q	5.192	2flr	9.008	2q6f	3.004	2a5b	4.16	3drg	2.03	3k02	9
1zea	7.39	2hah	4.75	2vt3	5.21	3g08	3.33	2uxz	4.03	2aoc	15.9863	2pqc	2.04	2v2v	5.129	2fmb	2.179	2q7y	2.299	2a8g	4.3	3dri	4.55	3i25	9
1zoe	5.55	2hb3	2.23	2vvs	2.23	3g19	2.05	2uyq	3.91	2aod	6.7839	2pqz	2.04	2vfk	7.707	2fpz	2.346	2q8h	2.272	2aoc	4.2	3dxg	4.78	3ed0	9
1zog	3.62	2hhn	2.93	2vyt	4.72	3g2z	3.98	2v2q	2.33	2aoe	12.9174	2pv1	6.71	2vhj	2.047	2fxs	5.872	2qbw	10.418	2aod	4.53	3dxh	5.07	3buf	9
1zoh	3.08	2hkf	6.16	2w5g	4.82	3g32	3.59	2v8w	2.47	2aog	9.6261	2pwc	2.04	2vmf	2.622	2g70	2.094	2qfo	2.682	2aoe	3.93	3dzt	9.41	3arv	9
1zp8	3.55	2hmu	2.26	2w9h	3.46	3g34	2.65	2vfk	2.36	2aqu	12.5897	2pwr	2.6	2vot	2.561	2g8r	6.988	2qg2	4.901	2aog	5.48	3e6y	5.04	2y8c	9
1zpa	4.6	2i0a	2.11	2wbg	2.64	3gdt	4.11	2vhj	2.18	2arm	4.5822	2q54	4.23	2vqt	2.896	2g94	3.002	2qi3	3.695	2aqu	4.11	3eax	8.7	2xdx	9
2a14	3.02	2i2c	3.02	2wc3	3.85	3gi4	2.08	2vt3	3.61	2avm	15.6892	2q55	2.16	2vt3	3.79	2gj5	2.973	2qi5	3.913	2arm	3.08	3eb1	4.1	2vmf	9
2a4m	5.12	2i4d	2.42	2wc4	4.11	3gqz	4.79	2w5g	2.8	2avo	4.9603	2q6f	2.91	2vvs	3.984	2glp	2.951	2qm9	3.437	2avm	5.86	3ed0	3.29	2vfk	9
2a5b	2.32	2i4j	4.68	2wcg	2.01	3gr2	3.88	2web	3.4	2avq	12.1472	2q8h	2.94	2vwc	5.144	2gss	3.624	2qmj	3.126	2avo	2.83	3el5	4.08	2rkg	9
2a8g	2.18	2i4x	2.18	2wec	2.74	3gss	3.9	2wec	3.28	2avs	11.3103	2qbu	3.91	2w5g	3.389	2gst	2.733	2qnp	4.201	2avq	3.3	3ery	3	2pk6	9
2ans	4.7	2i4z	2.75	2wn9	3.19	3gus	4	2wkz	4.01	2avv	2.7102	2qbw	5.61	2wc4	2.392	2gv6	5.317	2qnq	4.636	2avs	3.71	3f8f	3.6	2pk5	9
2aoc	4.58	2ihj	7	2wr8	3.28	3gx0	4.52	2wzm	2.59	2azr	4.1025	2qft	3.13	2web	2.092	2gv7	5.03	2r0h	6.41	2avv	2.17	3fhb	3.01	2p4j	9
2aod	5.02	2ihq	3.57	2wuf	2.11	3h1x	6.75	2x6x	5.35	2b07	2.0595	2qfu	3.51	2wk6	2.456	2h4k	2.045	2r0z	3.932	2b07	2.45	3fjg	4.49	2oxd	9
2aoe	10.06	2il2	6.25	2xb7	5.22	3h78	2.18	2xdk	2.09	2b1i	7.3301	2qg0	2.85	2wkz	9.521	2ha3	2.902	2r2m	2.336	2b7d	3.29	3fvh	3.48	2o1c	9
2aog	3.51	2itk	2.16	2xdx	2.38	3h89	4.32	2xdx	2.16	2b7d	4.0257	2qhz	2.47	2wl0	9.79	2ha5	2.486	2r9w	4.032	2b9a	6.52	3g08	5.95	2nn8	9
2aqu	5.77	2iwx	4.74	2xmy	3.88	3h8b	6.42	2xog	3.2	2bmk	3.2039	2qm9	3.87	2x6x	2.01	2ha6	3.472	2r9x	7.072	2bak	7.04	3g31	2.31	2j77	9
2arm	5.03	2j27	3.34	2xnb	5.24	3hit	4.38	2xye	3.03	2bo4	3.5449	2qmj	3.19	2xjx	2.469	2hkf	5.701	2rkg	2.153	2bfq	2.01	3g32	2.75	2itk	9
2avm	7.58	2j47	4.15	2xog	4.2	3hv8	2.94	2y8c	2.41	2bpv	11.3895	2qnp	3.76	2xog	3.957	2hnx	3.65	2uy4	5.002	2bo4	2.19	3g34	3.93	2i4x	9
2avo	3.1	2j4g	5.85	2y5f	4.07	3i25	3.32	2yim	4.85	2bpy	12.3949	2qnq	2.15	2xye	3.254	2i0a	7.734	2uyq	5.209	2bpv	5.11	3gdt	3.93	2fmb	9
2avq	8.82	2j77	2.4	2y8c	2.07	3i73	5.92	2yxj	2.31	2bqv	10.7426	2qrk	2.03	2xyf	3.856	2i2c	5.947	2v2q	4.007	2bpy	5.78	3ggu	4.67	2e7l	9
2avs	5	2j7b	3.19	2ya6	4.45	3ie3	3.57	2zy1	2.24	2bvr	4.712	2qrl	4.64	2y8c	3.726	2i4j	10.129	2v2v	8.579	2bqv	2.01	3gr2	3.36	2cet	9
2b07	2.53	2j7e	3.29	2ya7	4.29	3ifl	3.6	3a5y	2.59	2bvs	5.267	2r0h	2.3	2y9g	2.561	2i4v	3.458	2v8w	3.85	2bvr	2.89	3gss	4.16	2avv	9
2b1i	4.56	2jiw	2.94	2ybu	2.8	3ime	4.68	3aaq	3.45	2c3i	4.1451	2r0z	7.14	2ya7	4.203	2i4x	7.579	2vh6	3.087	2bvs	3.97	3gtc	2.49	2avm	9
2b7d	6.1	2jxr	2.24	2yim	3.66	3iss	4.38	3adv	3.37	2c97	2.2081	2r2m	2.1	2yel	3.008	2i4z	9.729	2vhj	2.302	2c80	2.26	3gus	5.01	2aod	9
2b9a	6.64	2nn8	3.99	2yki	8.2	3iub	2.56	3ap4	3.43	2cbu	3.381	2r38	2.67	2yge	3.136	2idw	9.177	2vmf	3.104	2ce9	5.35	3gv9	2.2	2a8g	9
2bak	4.56	2nnp	2.88	2ylc	3.02	3iw5	3.92	3arp	2.89	2cbv	5.0966	2r3t	2.56	2yim	6.319	2ieo	3.618	2vnt	2.272	2cej	4.09	3gx0	4.34	1zpa	9
2bfq	5.21	2nta	2.51	2zb1	3.98	3jzg	4.53	3b27	3.04	2ce9	7.1253	2r3w	2.04	2zy1	3.159	2itk	2.108	2vo4	5.048	2cen	5.83	3h1x	6.04	1xkk	9
2bo4	2.39	2o0u	2.42	2zjw	2.56	3jzh	3.16	3b50	4.11	2cej	10.5568	2r43	2.16	3a5y	3.204	2iuz	2.768	2vot	2.724	2ceq	3.02	3h30	4.47	1w4q	9
2bpv	3.64	2o1c	5.97	2zy1	2.49	3k02	2.9	3b5j	2.45	2cen	10.6877	2r58	5.64	3aaq	3.825	2j27	2.086	2vvs	2.025	2cet	2.84	3h89	3.17	1uwu	9
2bpy	3.81	2ot1	3.71	3a5y	5.22	3k5v	2.18	3b7j	3.34	2ceq	4.3481	2r5p	10.52	3adv	4.512	2j77	2.25	2vwm	2.062	2d3u	5.67	3h8b	3.54	1q7a	9
2bqv	4.08	2ov4	2.06	3a6t	2.52	3kku	3.93	3bbb	3.87	2cer	8.3257	2rd6	5.28	3ai8	2.988	2j79	3.974	2w5g	2.472	2e2p	2.4	3hit	6.35	1ppm	9
2brb	3.94	2oxd	4.23	3aaq	7.89	3kyq	6.91	3bex	2.5	2ces	4.1665	2rkf	3.53	3aid	3.569	2j7b	3.112	2wb5	2.032	2e5y	3.3	3i25	3.16	1ppl	9
2brm	4.8	2oxn	4.78	3ai8	2.56	3lbz	4.16	3bf1	2.11	2cet	7.6064	2rkg	10.51	3arp	3.423	2j7e	4.706	2wbg	2.398	2e7l	3.73	3i73	10.25	1nw5	9
2bvr	3.42	2oxx	4.18	3arp	5.74	3lzz	3.75	3bgb	2.07	2cle	4.2073	2v2q	5	3arq	3.133	2j7f	3.88	2wc3	2.692	2er6	10.7	3ie3	4.53	1n8v	9
2bvs	3.06	2oxy	3.84	3arq	2.73	3m3e	4.65	3bgc	3.26	2d0k	2.7451	2v2v	6.39	3aru	2.787	2j7g	3.408	2wec	6.083	2euk	9.68	3ifl	4.7	1n5r	9
2c3l	3.66	2p3a	2.64	3ary	3.27	3m3o	5.72	3bv9	3.64	2e5y	4.0236	2v3u	2.76	3arv	3.304	2jiw	4.989	2wgj	8.804	2eum	3.91	3ime	4.24	1m2q	9
2ca8	3.66	2p3b	3.28	3axz	4.97	3m8u	2.87	3bva	3.75	2e9u	7.7133	2v8w	2.78	3arx	4.46	2nmz	11.127	2wl0	2.04	2evl	8.84	3iub	2.82	1kpm	9
2cbj	2.12	2p4j	6.88	3b2q	4.24	3mam	3.1	3bze	4.86	2epn	4.0029	2vfk	2.21	3ary	5.031	2nn8	7.214	2wyj	5.076	2f2h	6.72	3jrs	2.38	1jqy	9
2ce9	4.76	2p95	4.64	3b3x	2.32	3mhw	2.46	3bzf	4.38	2er6	11.2135	2vjx	2.99	3b2q	2.895	2nta	2.013	2wzm	2.505	2fdp	2.84	3jy0	2.52	1ec3	9
2cej	5.37	2pk5	3.33	3b50	2.79	3mss	2.09	3c2f	3.53	2euk	13.1256	2vkm	2.87	3b3x	2.31	2o0u	3.123	2x6x	5.66	2fgu	3.8	3jzg	7.8	1d6w	9
2cen	7.59	2pmk	4.09	3b5j	6.14	3n0h	2.48	3cf8	2.32	2eum	5.7228	2vmf	2.62	3b5j	3.237	2o1c	3.692	2xb7	7.321	2fle	4.74	3jzh	2.75	1amw	9
2ceq	3.3	2pqc	2.02	3b7j	2.62	3n3g	2.98	3ckp	3.48	2evl	8.9284	2vot	2.77	3b7j	3.711	2o4s	3.516	2xdk	2.306	2fmb	3.68	3k4d	2.72	4n7m	8
2cer	2.44	2pv1	2.56	3bbb	5.19	3nsn	2.33	3d1x	2.39	2f2h	6.639	2vqt	4.46	3bbb	5.183	2oag	2.172	2xii	4.614	2fxs	3.8	3kdd	2.02	4jkw	8
2ces	3.32	2q54	3.41	3bf1	4.74	3nu9	2.01	3d6o	2.35	2f34	2.3858	2vw2	2.04	3bf1	2.463	2ole	2.346	2xjx	2.993	2fxv	4	3kmy	2.25	4jc1	8
2cet	2.79	2q6f	4.56	3bfu	2.48	3nw3	2.49	3d6q	2.39	2f80	8.0951	2w5g	2.57	3bgb	2.966	2on6	2.199	2y5h	2.11	2g8r	5.61	3kyq	7.52	4f7v	8
2d0k	4.18	2q7y	6.43	3bze	4.24	3o4k	8.8	3d8y	2.32	2f81	8.9126	2wcg	3.73	3bgc	2.854	2ot1	7.771	2y8c	3.056	2g94	5.36	3lvw	2.54	4etz	8
2e2p	2.85	2q8h	2.84	3c2f	4.01	3o5n	4.29	3d8z	2.34	2f8g	9.9064	2web	5.92	3buf	2.495	2oxd	3.273	2yel	4	2gh9	3.42	3lzz	6.02	4ddm	8
2e5y	5.65	2qbw	8.97	3c8e	2.91	3o5x	4.3	3d91	3.67	2fdp	2.9983	2wec	3.91	3bva	8.65	2oxx	4.147	2yim	6.236	2gj5	2.96	3m3o	5.75	4arw	8
2e7l	4.37	2qfo	2.44	3cf8	2.85	3o6m	6.33	3djk	3.11	2fle	9.501	2weq	7.69	3bvb	2.153	2oxy	3.833	2yxj	2.741	2glp	4.39	3mam	3.26	4a6l	8
2er6	9.27	2qhd	5.29	3ckp	2.55	3oaf	2.3	3djq	5.46	2fmb	7.2952	2wk6	2.27	3bze	5.257	2p3a	9.406	2za5	2.826	2gst	5.85	3n3g	3.58	3zsx	8
2ewa	6.88	2qi7	2.47	3coy	2.49	3obq	2.51	3djx	4.71	2fpz	4.1075	2wky	2.65	3bzf	3.525	2p3b	2.798	2zx7	2.713	2gv6	5.26	3nee	2.78	3zll	8
2f1g	4.13	2qm9	2.38	3d6o	2.33	3obu	2.35	3dk1	3.49	2g8r	6.304	2wl0	11.81	3c2f	4.938	2p3c	5.276	3aaq	2.848	2gv7	5.94	3ng4	7.12	3v7t	8
2f34	2.19	2qmg	3.89	3d6p	2.45	3obx	2.89	3drg	3.4	2g94	11.7734	2xde	4.21	3cct	4.534	2pcp	4.005	3adv	4.15	2ha6	2.14	3nox	2.02	3suu	8
2f35	2.27	2qmj	5.98	3d6q	2.57	3odu	2.48	3dri	4.02	2gj5	5.5084	2xdk	4.25	3cdb	3.791	2pk5	10.864	3afk	4.792	2hah	4.58	3nq9	4.18	3s6t	8
2f80	2.5	2qrl	2.21	3d7b	2.83	3owj	5.3	3dsz	2.52	2glp	5.3435	2xdl	5.46	3cf8	5.011	2pk6	2.416	3ai8	3.959	2hhn	3.86	3nu4	5.56	3obq	8
2fgu	3.71	2qtt	2.53	3djo	2.09	3p9m	5.11	3dxg	3.51	2gss	4.0297	2xdx	4.81	3ckp	4.335	2pmk	4.859	3arq	2.904	2hkf	4.68	3nu5	7.15	3oaf	8
2fgv	2.79	2r0z	2.89	3djp	3.31	3p9t	2.24	3dxh	3.06	2gst	7.058	2xg9	4.82	3cow	2.07	2pu2	3.768	3arv	6.609	2hmu	2.1	3nu9	6.35	3n0h	8
2fle	5.64	2ra0	4.92	3djq	2.18	3ppm	2.22	3e85	4.36	2gv6	5.4881	2xjx	4.66	3coy	4.485	2pv1	5.764	3ary	7.108	2hnx	2.09	3nuj	6.02	3mss	8
2fmb	3.74	2rkf	3.54	3djv	2.84	3ppq	2.81	3eax	4.43	2h21	7.2455	2xog	3.17	3d20	2.151	2q54	2.94	3b3x	2.331	2hs1	2.63	3nw3	7.7	3lvw	8
2fqw	4.41	2rkg	2.98	3djx	2.77	3pxf	4.06	3eb1	3.22	2ha2	8.6549	2xyt	5.9	3d6o	3.606	2q6f	6.768	3b5j	6.974	2hs2	3.4	3o4k	9.08	3ldq	8
2fqy	3.73	2uxi	2.15	3dp9	4.05	3q6z	2.33	3ed0	3.25	2ha6	8.5129	2y7p	2.59	3d6p	3.619	2q8h	2.276	3b7j	2.579	2hxm	3.7	3o5n	3.54	3l4x	8
2fvd	2.49	2uy0	2.3	3drf	5.37	3qkd	3.37	3efs	2.45	2hah	3.5766	2ya6	4.56	3d6q	3.267	2qbw	2.959	3bbb	6.024	2i0a	2.76	3o5x	4.69	3iw5	8
2fxs	4.66	2uyq	2.26	3drg	7.64	3qqa	3.92	3ekt	2.17	2hkf	5.9214	2ya7	4.59	3d7b	2.997	2qd8	3.811	3bf1	3.473	2i2c	4.01	3o6m	2.69	3iub	8
2fxv	4.14	2v2q	5.05	3dri	8.11	3qx8	5.75	3el1	3.52	2i0a	11.1252	2ybu	2.54	3d8y	4.768	2qfo	3.281	3bgb	2.057	2i4d	2.39	3oaf	2.44	3gtc	8
2g8r	5.54	2v2v	5.87	3dsz	6.97	3r0y	4.79	3ery	4.02	2i2b	3.48	2yfx	3.09	3d8z	5.552	2qg2	5.399	3bgc	2.072	2i4j	2.08	3obx	3.15	3fv3	8
2g94	4.71	2v57	3.81	3dxg	3.58	3r1v	8.17	3evd	2.2	2i4j	2.9506	2yim	4.4	3djq	5.804	2qhd	7.539	3bra	2.759	2i4u	3.33	3p2e	8.53	3el9	8
2gj5	3.44	2v8w	4.4	3dxh	2.31	3r4m	2.4	3f8f	4.16	2i4u	10.2575	2yln	6.35	3djv	6.588	2qhy	3.893	3bug	3.116	2i4w	3.1	3p3r	2.89	3el1	8
2gl0	4.59	2vfk	2.36	3e85	2.23	3rdv	5.3	3fv3	2.85	2i4x	2.3686	2yxj	3.27	3djx	5.222	2qi3	3.837	3bva	3.537	2i4x	3.35	3pb3	8.46	3e85	8
2glp	3.73	2vhj	4.6	3eax	7.08	3rt4	2.93	3fvh	3.25	2i4z	10.0016	2zc9	2.45	3dk1	3.592	2qi7	2.347	3bxg	2.5	2i4z	4.07	3ppm	2.44	3drf	8
2gss	4.99	2vo4	4.98	3eb1	5.15	3s6t	3.13	3fzy	2.5	2i6b	7.0356	2zfp	5.32	3drg	3.786	2qm9	4.548	3bze	5.843	2idw	2.46	3q6z	2.5	3djp	8
2gst	2.04	2vot	2.29	3eeb	2.36	3s8l	2.65	3g08	5.5	2i80	8.4563	2zjw	2.39	3dri	2.553	2qmj	2.324	3bzf	5.447	2ieo	3.85	3qfz	2.45	3c8e	8
2gv6	4.12	2vt3	2.26	3efs	5.44	3s8n	2.42	3g2z	2.83	2ieo	8.1164	2zwz	3.94	3dsz	5.747	2qpq	3.307	3c2r	2.868	2ihj	4.8	3qps	7.38	3bv9	8
2gv7	6.12	2vvn	2.74	3el9	3.93	3spf	3.96	3g31	2.36	2iko	2.0836	3aaq	2.53	3dxg	4.064	2qrl	2.271	3cda	9.447	2iko	2.25	3qqa	7.73	3aru	8
2h21	3.62	2vvs	4.18	3ery	2.63	3suu	2.25	3g32	2.75	2itk	7.4325	3acw	4.19	3dxh	5.21	2r0z	11.434	3cdb	3.917	2il2	3.3	3qx8	4.12	2xye	8
2ha2	2.85	2vwc	5.64	3evd	4.34	3t6b	2.42	3g34	3.08	2iwx	5.2838	3acx	4.64	3eax	7.627	2r9w	3.871	3cf8	2.928	2itk	3.35	3qx9	5.25	2xdk	8
2ha5	2.85	2vyt	3.42	3f3t	5.61	3t70	2.73	3gdt	3.27	2j47	7.544	3adv	2.06	3eb1	3.524	2r9x	6.833	3cfn	3.824	2j77	2.18	3r0y	6.08	2x6x	8
2ha6	2.18	2w5g	3.66	3f3u	3.61	3tf6	3.26	3gi4	3.13	2j62	11.2634	3afk	4.53	3ed0	3.429	2rin	3.535	3cft	2.706	2j79	2.89	3r4n	2.63	2wc4	8
2hah	2.31	2wb5	3.67	3f8c	6.99	3tmk	2.07	3gi5	3.1	2j77	2.2629	3ai8	3.83	3eeb	2.396	2rkf	4.849	3ckp	3.26	2j7d	2.98	3rdv	3.35	2vt3	8
2hb3	2.71	2wbg	3.04	3f8f	3.5	3uil	5.22	3gi6	3.22	2j79	6.9585	3arp	3.33	3ekp	3.426	2rkg	9.054	3ctt	4.063	2j7f	5.39	3rlp	2.05	2uyq	8
2hhn	3.97	2wc3	3.57	3fk1	3.1	3umq	5.77	3gr2	2.41	2j7b	5.4216	3arq	6.87	3ekr	3.223	2sim	4.642	3cyx	2.032	2jxr	5.89	3roc	10.4	2rkf	8
2hkf	5.13	2wc4	3.19	3fv3	2.44	3uri	4.46	3gss	5.01	2j7d	5.6668	3aru	3.12	3ekt	4.833	2uxz	5.249	3d0b	3.299	2nmz	5.7	3rt4	2.75	2qi3	8
2hmu	6.73	2web	4.76	3fvh	5.43	3usx	4.89	3gst	3.01	2j7e	5.8476	3arv	2.47	3ekv	3.283	2uy3	2.839	3d1x	2.345	2nn8	3.27	3ru1	4.38	2q54	8
2hs1	3.57	2wec	5.57	3fzy	2.22	3uyr	4.07	3gx0	4.3	2j7f	5.4112	3ary	6.68	3ekw	10.926	2uyq	5.498	3d1z	3.637	2o0u	2.01	3s43	2.03	2p95	8
2hs2	4.44	2weq	6.37	3g08	2.1	3v4t	3.05	3h1x	2.92	2j7g	5.7594	3b3x	4.54	3el1	7.045	2v2q	6.106	3d6o	6.461	2o4k	5.9	3s56	5	2oxx	8
2hzl	2.38	2wm0	3.18	3g19	2.4	3v78	2.2	3h30	2.69	2jg0	2.9636	3b5j	2.35	3el9	3.797	2v2v	5.083	3d6p	2.398	2o4l	3.09	3spf	4.21	2i0a	8
2i0a	4.01	2wn9	4.37	3g2z	2.07	3v7t	2.38	3h5b	2.36	2jiw	4.43	3bbb	6.08	3f3u	4.633	2v8w	4.35	3d6q	6.126	2o4n	3.38	3tu7	3	2g94	8
2i4d	3.07	2wuf	3.48	3g34	2.49	3vje	2.03	3h89	3.88	2jxr	9.2843	3bgb	2.01	3f8c	5.994	2vfk	7.796	3d78	2.062	2o4p	2.59	3ug2	5.43	2fle	8
2i4j	5.13	2wzm	2.19	3gcp	5.65	3vtr	2.4	3h8b	3.88	2nn8	5.6281	3bqc	4.52	3f8f	4.214	2vhj	3.816	3d7b	6.349	2ole	2.06	3uil	4.6	2e5y	8
2i4v	3.69	2xb7	4.76	3gcu	9.8	3vvy	5.04	3hit	5.81	2nta	2.0315	3bra	2.69	3fvh	4.852	2vmf	3.362	3d8y	6.345	2ot1	4.92	3ujc	8.37	2ces	8
2i4w	2.93	2xdk	2.72	3gdt	4.55	3vw2	3.24	3hv8	3.14	2o1c	6.5472	3buf	2.9	3fzy	2.432	2vot	2.844	3d8z	3.619	2ov4	2.63	3umq	8.3	2cer	8
2i4x	3.38	2xii	2.43	3gr2	2.02	3zk6	5.4	3i25	2.18	2o4k	13.1047	3bug	2.87	3g08	7.026	2vqt	3.153	3djq	3.122	2oxd	2.99	3uri	11.55	2ceq	8
2i4z	4.81	2xjx	2.14	3gsm	2.11	3zv7	4.13	3i73	4.21	2o4l	2.3415	3buh	3.41	3g2z	3.026	2vt3	3.409	3djx	5.234	2oxn	3.14	3usx	5.12	2bpy	8
2ihj	5.88	2xmy	2.41	3gss	4.75	4ahs	2.88	3ie3	2.93	2o4n	9.4092	3bze	15.16	3g32	3.432	2vvs	4.395	3dri	2.634	2oxx	3.4	3uyr	4.65	2b07	8
2ihq	3.98	2xog	3.82	3gtc	3.29	4b2i	3.75	3ies	2.1	2o4p	3.526	3c2f	4.32	3g34	2.753	2vwc	5.087	3dsz	6.269	2oxy	2.41	3v78	3.95	1w9u	8
2il2	2.45	2xye	3.83	3gus	3	4b32	3.77	3ifl	5.53	2o4s	11.1444	3c8e	3.49	3g35	2.42	2w5g	3.193	3dxg	2.524	2p3a	6.12	3veh	2.92	1w5x	8
2itk	4.07	2y5f	2.85	3gvu	5.9	4b34	3.66	3iod	2.9	2oag	2.3836	3cct	3.03	3gdt	2.383	2w8w	2.035	3eax	6.562	2p3b	3.97	3vvy	4.33	1sv3	8
2j27	3.19	2y7p	2.07	3gx0	4.19	4b3b	3.22	3isj	2.88	2ot1	6.5276	3cd7	2.36	3gi4	4.106	2wbg	8.331	3eb1	3.283	2p3c	3.94	3w07	2.01	1sb1	8
2j77	2.35	2y9g	4.5	3h1x	2.58	4b3d	2.31	3iss	2.7	2ov4	4.5453	3cda	3.91	3gi5	4.542	2wc3	2.541	3ed0	5.413	2p4j	3.09	3zk6	4.29	1rnm	8
2j7b	3.26	2ybu	2.29	3h30	4.82	4b9z	2.5	3iue	3.39	2oxd	5.1679	3cdb	4.69	3gi6	4.265	2wc4	8.189	3ekp	2.487	2p95	2.49	3zll	2.81	1qxk	8
2j7g	3.08	2yim	5.98	3h5b	3.55	4br3	3.31	3ivc	2.2	2oxn	2.6649	3cf8	5.68	3gqz	3.592	2wec	5.907	3ery	4.155	2pbw	2.36	3zsx	2.31	1ppk	8
2jgs	2.49	2yki	8.09	3h89	4.17	4ceb	4.62	3iw5	2.96	2oxx	4.1911	3cfn	5.83	3gs6	2.728	2whp	2.278	3f8f	5.439	2pk5	3.43	4ahs	3.26	1nz7	8
2jxr	3.95	2zjw	2.43	3h8b	5.23	4da5	2.06	3jdw	3.1	2oym	7.1482	3ckp	3.13	3gss	2.232	2wk6	5.386	3fvh	8.235	2pk6	5.76	4arw	5.86	1jyq	8
2nmz	3.48	2zx6	3.63	3hit	2.33	4ddm	3.01	3jrs	2.09	2p3a	9.5463	3cow	3.28	3gtc	5.791	2wl0	11.677	3fzy	5.463	2pmk	6.34	4b3b	2.22	1jmi	8
2nn8	3.93	3a6t	2.54	3hl7	5.03	4des	6.19	3jzg	4.28	2p3b	9.444	3coy	3.22	3gus	2.812	2wn9	6.91	3g08	4.144	2pu2	2.85	4b5d	3.9	1iiq	8
2nt7	8.7	3aaq	4.93	3hmo	2.26	4det	2.04	3jzh	3.69	2p3c	10.0573	3coz	3.14	3gx0	2.834	2wnc	2.926	3g2z	4.821	2pv1	4.9	4b76	2.97	1hxw	8
2o0u	2.01	3adv	3.43	3huc	4.24	4dew	7	3k02	2.25	2p4j	12.8919	3cyx	2.02	3h1x	6.268	2wnj	5.183	3g31	2.059	2pwr	2.33	4bqg	3.64	1hvl	8
2o1c	5.91	3afk	4.56	3hv8	3.03	4dy6	3.92	3kdd	2.3	2pbw	3.2161	3d1x	2.12	3h30	4.028	2wzm	2.529	3g32	2.475	2pym	4.38	4br3	10.17	1hvk	8
2o4k	3.82	3ai8	3.13	3i73	8.41	4e67	4.2	3kgu	2.31	2pk5	2.9725	3d1y	2.04	3h89	12.865	2x6x	6.137	3g34	2.918	2q54	3.13	4ceb	4.71	1hvj	8
2o4l	2.51	3aid	2.28	3ie3	3.07	4efk	2.6	3kyq	2.63	2pmk	2.6731	3d6o	5.28	3h8b	6.671	2xdk	3.967	3gcp	4.2	2q5k	2.2	4cgi	5.49	1hpx	8
2o4n	3.54	3ap4	3.02	3ifl	3.32	4emf	2.83	3l4v	2.08	2pq9	2.0288	3d6p	5.6	3hit	5.866	2xdl	2.439	3ggu	3.365	2q6f	4.98	4dbm	3.39	1hi4	8
2o4p	2.76	3arp	3.22	3iob	2.4	4emr	2.23	3l4x	2.5	2psv	3.8534	3d6q	5.36	3hv8	3.306	2xdx	4.23	3gi4	2.143	2q7y	3.49	4ddk	4.05	1f4f	8
2o4s	3.95	3arq	3.15	3iod	4.82	4er1	2.98	3lbj	3.28	2pv1	4.397	3d7b	4.99	3i73	6.819	2xjx	2.14	3gi5	3.402	2q8h	2.87	4ddm	3.77	1bhf	8
2ole	2.77	3aru	3.88	3ipu	2.5	4er2	2.57	3lpk	2.46	2pym	7.909	3d8y	5.31	3ie3	3.001	2xm2	3.617	3gr2	5.684	2qbw	5.12	4de2	5.35	1a94	8
2on6	4.04	3arv	5.99	3iss	2.87	4eu0	2.26	3lvw	2.17	2pyn	8.8001	3d8z	3.08	3ifl	3.585	2xn3	2.356	3gs6	2.637	2qd6	3.79	4de5	3.84	10gs	8
2ot1	7.1	3arw	6.08	3iub	2.52	4ew2	2.03	3lzs	2.26	2pyy	3.9489	3djk	9.18	3ioe	6.766	2xp7	2.637	3gss	3.375	2qd7	2.2	4djp	4.48	4km2	7
2ov4	2.18	3ary	4.62	3iue	2.33	4ezr	5.26	3lzz	2.78	2q54	7.7864	3djo	4.37	3iss	2.128	2xye	3.119	3gst	3.322	2qg0	4.42	4djr	2.11	4ih5	7
2oxd	4.23	3b3x	2.47	3ivc	2.12	4ezx	2.77	3m8u	3.01	2q55	12.0238	3djp	6.18	3iw5	4.791	2xyf	5.719	3gus	4.771	2qg2	2.12	4dju	3.9	4hym	7
2oxn	5.43	3b50	3.9	3jyr	2.23	4ezz	2.42	3mxe	2.71	2q5k	7.4766	3djq	2.14	3jzg	8.098	2y8c	3.922	3gx0	5.097	2qhy	3.03	4djw	2.78	4h3f	7
2oxx	4.17	3b5j	5.39	3jzg	8.98	4fcf	2.24	3n3g	2.45	2q64	8.5711	3djx	3.08	3jzh	7.689	2y9g	2.7	3h1x	9.905	2qhz	2.34	4djx	5.19	4g0q	7
2oxy	4.51	3b7j	3.87	3jzh	7.49	4fcq	4.3	3nq9	4.63	2q6f	6.6332	3drf	2.08	3jzj	2.141	2ydw	7.314	3h30	3.325	2qi0	2.33	4dkp	2.9	4fcq	7
2p2a	2.38	3bbb	3.51	3k02	2.74	4fnn	4.86	3nsn	3.25	2q7y	6.6793	3drg	7.66	3kku	3.939	2yel	4.108	3h89	5.903	2qi1	2.53	4dy6	5.42	4fcf	7
2p3a	8.47	3bf1	4.58	3k4d	2.84	4fys	2.18	3nu4	2.26	2q8h	2.8378	3dri	3.17	3kyq	5.062	2yge	5.878	3h8b	3.107	2qi3	2.25	4e67	2.61	4ew2	7
2p3b	5.48	3bqc	3.38	3k5v	2.27	4fzj	4.97	3nu5	2.02	2q8z	2.4248	3dxg	5.26	3lbj	4.774	2yim	4.496	3hb4	2.085	2qi5	2.03	4ea1	3.22	4djq	7
2p3c	6.45	3brn	2.17	3k8o	2.24	4g0q	2.26	3nw3	3.3	2qbq	3.0493	3dxh	2.55	3ldq	3.674	2zn7	3.799	3hit	3.107	2qm9	3.19	4efk	8.19	4dbm	7
2p4j	5.68	3buf	2.89	3kgt	2.83	4g0z	2.48	3o4k	8.85	2qbr	2.272	3eax	5	3lpk	3.207	2zy1	2.697	3hl7	2.463	2qmg	3.77	4er2	2.06	4ceb	7
2p4s	3.19	3bv9	3.92	3kgu	2.9	4gah	3.59	3o5x	2.58	2qbu	3.0989	3eb1	4.63	3lvw	3.315	3a5y	8.509	3hmp	6.156	2qmj	2.2	4ezr	14.23	3zv7	7
2pk5	5.57	3bva	2.07	3kku	4.23	4h75	3.91	3o6m	3.63	2qd6	7.1189	3ed0	3.62	3lzs	3.587	3aaq	2.627	3hv8	2.697	2qrk	7.91	4ezx	2.68	3zsq	7
2pk6	3.57	3bzf	6	3kmy	2.55	4hj2	4.67	3o9a	2.17	2qfo	3.5014	3ery	4.8	3lzz	4.212	3adv	4.579	3i25	7.917	2r0h	6.34	4flp	5.04	3vje	7
2pmk	5.69	3c2f	5.63	3kyq	6.38	4i8n	2.57	3o9d	3.03	2qg2	2.0975	3f3a	5.33	3m3e	5.274	3afk	5.54	3i5z	3.764	2r0z	6.83	4fnn	5.51	3upk	7
2pqz	2.3	3c8e	4.72	3l3l	2.7	4ieh	2.68	3o9e	2.08	2qhd	3.1191	3f70	2.4	3m3o	3.241	3ai8	3.014	3i73	6.025	2r3t	2.29	4fs4	4	3ta0	7
2psu	3.57	3cdb	4.55	3l3m	3.61	4ih5	3.3	3o9i	2.44	2qhy	2.5375	3f8c	9.76	3m8u	5.96	3aid	8.538	3ie3	3.521	2r58	4.02	4fys	3.61	3r1v	7
2psv	2.99	3cf8	3.66	3l4x	2.06	4j7e	3.27	3obq	2.53	2qhz	4.9993	3f8f	6.26	3mam	2.182	3arp	13.725	3ifl	4.202	2r5a	2.79	4fzj	2.68	3qfz	7
2pv1	5.74	3cfn	2.43	3lbz	4.03	4jc1	3.75	3obu	3.67	2qi0	8.4651	3fj7	3.96	3mxd	5.756	3arq	3.743	3ip6	3.306	2r9w	3.4	4g0p	2.72	3q71	7
2pwc	3.38	3cj5	3.02	3ldq	4.34	4jfm	2.35	3obx	3.96	2qi5	9.091	3fjg	4.19	3mxe	10.617	3arr	2.751	3iss	3.396	2rkf	3.87	4g0q	3.96	3pju	7
2pym	2.08	3ckp	2.14	3lgs	2.44	4jwk	2.4	3ov1	2.54	2qi6	7.5929	3fjz	4.05	3n3g	2.559	3aru	2.899	3iub	2.611	2rkg	5.08	4g8v	5.97	3p2e	7
2pyn	2.35	3coz	2.77	3lzz	2.43	4jx9	2.76	3owj	4.4	2qm9	2.6611	3fk1	4.1	3nee	2.586	3arv	5.884	3iue	2.434	2sim	4.06	4g90	2.29	3ov1	7
2q54	5.42	3d6o	2.68	3m3c	5.38	4jym	2.36	3p3r	2.43	2qmg	3.3737	3fvh	4.35	3nex	2.195	3arw	7.081	3iw5	4.03	2uxi	7.27	4gah	2.28	3odu	7
2q55	3.08	3d6p	2.56	3m3e	4.39	4k55	4.08	3p9m	4.88	2qmj	7.0108	3fzy	2.23	3nq3	2.863	3ary	7.655	3jvs	9.409	2uxz	3.88	4gny	2.99	3m8u	7
2q5k	3.57	3d6q	2.79	3m3o	5.34	4kcx	2.36	3p9t	2.71	2qnn	10.3307	3g19	6.57	3nq9	3.939	3b2q	9.044	3jzg	2.114	2uy0	3.33	4gq4	2.47	3kmy	7
2q6f	6.05	3d78	2.47	3m3z	5.11	4lvt	3.3	3ppm	2.91	2qrk	8.0208	3g2z	3.44	3nsn	12.592	3b3x	2.444	3jzh	2.298	2uy4	3.5	4h3f	7.03	3iod	7
2q7y	4.41	3d7b	2.71	3mhw	2.01	4ly9	2.08	3prs	4.53	2qrl	4.2903	3g30	6.42	3nw3	3.856	3b5j	5.942	3k02	2.043	2v2q	4.89	4h75	3.67	3h30	7
2q8h	2.83	3d8y	3.29	3mss	2.25	4mlu	3.35	3pxf	4.21	2r0z	6.9583	3g32	5.93	3o4k	9.533	3b7j	7.075	3k4d	2.813	2v2v	5.03	4ha5	2.6	3gs6	7
2qbu	5.73	3d8z	2.64	3myg	7.13	4n7m	3.85	3q6z	2.18	2r2m	2.4136	3g34	6.59	3o5n	3.62	3bbb	6.854	3k8q	2.055	2vfk	2.47	4hla	3.76	3gi4	7
2qbw	9.31	3djp	3.96	3n0h	3.37	4np9	2.03	3q71	2.25	2r58	4.1584	3g35	7.79	3o5x	5.176	3bf1	3.864	3kgt	7.026	2vh6	2.08	4hym	4.55	3fzy	7
2qci	2.17	3djq	5.89	3nsn	2.83	4tmk	2.45	3qfy	2.13	2r5p	11.1584	3gdt	3.75	3o6m	6.593	3bqc	5.683	3kgu	6.804	2vhj	3.31	4i8w	5.25	3f8c	7
2qd6	2.31	3djv	2.96	3nw3	4.87	5er1	2.16	3qfz	3.08	2r9x	2.1359	3gjw	4.58	3o9d	3.389	3bra	3.53	3kku	7.077	2vkm	2.27	4i8z	5.48	3coy	7
2qd8	4.25	3djx	3.08	3nyx	4.39	5er2	3.44	3qkd	2.28	2rkf	3.9899	3gn7	4.57	3o9e	3.61	3buf	3.039	3kmy	2.054	2vmf	2.61	4i9h	2.2	3cfn	7
2qfo	3.2	3drg	3.52	3o4k	6.32	5tmp	3.49	3qoz	3.67	2rkm	6.6826	3gqz	6.78	3oaf	2.331	3bug	4.009	3kyq	6.412	2vo4	2.17	4i9u	4.93	3cdb	7
2qg0	3.81	3dri	3.61	3o5n	2.69			3qqa	2.09	2sim	4.1855	3gr2	5.53	3obx	2.062	3bv9	2.764	3l4u	2.042	2vot	2.98	4ieh	2.07	3arw	7
2qg2	4.98	3dxg	3.71	3o5x	2.8			3qx8	3.51	2uxz	6.658	3gss	4.97	3ok9	4.971	3bva	9.51	3ldq	2.246	2vt3	3.56	4ih5	3.01	2ybu	7
2qhd	5.63	3dxh	3.57	3o6m	3.46			3r0y	5.07	2uy0	11.2702	3gst	2.32	3owj	3.672	3bvb	8.45	3lzs	3.252	2vxn	2.36	4ih6	2.77	2xyf	7
2qhy	3.36	3e85	3.91	3oaf	2.43			3r4n	2.09	2uy4	5.1941	3gtc	4.98	3p9m	5.443	3bze	5.053	3lzz	2.466	2vyt	3.97	4j7e	8.12	2xjx	7
2qi1	3.21	3eax	5.85	3obu	3.85			3rdv	4.95	2uyq	6.761	3gus	3.21	3p9t	2.625	3c2f	6.074	3m3c	5.824	2w5g	2.54	4jkw	3.93	2wzm	7
2qi3	2.51	3eb1	3.17	3obx	4.5			3rt4	2.63	2v00	4.3764	3guz	3.54	3pju	3.918	3c2o	3.486	3m3e	5.48	2wc4	2.08	4jwk	2.89	2wn9	7
2qi4	2.07	3ed0	5.61	3ocp	3.91			3ru1	4.71	2v2q	9.4291	3gx0	4.39	3prs	7.432	3c2r	2.055	3m3o	6.756	2web	3.69	4jx9	2.81	2wk6	7
2qi5	5.39	3efs	2.96	3odu	2.56			3rv8	2.14	2v2v	5.2738	3h1x	6.57	3pww	4.548	3c79	3.16	3m3z	2.163	2wec	2.77	4k55	5.7	2web	7
2qi6	4.98	3el1	2.58	3ov1	2.15			3s6t	2.02	2v57	2.7197	3h89	2.73	3pyy	2.796	3c8e	6.307	3mam	3.11	2wed	3.15	4kcx	5.36	2wc3	7
2qi7	3	3el9	4.4	3owj	2.55			3s8n	2.15	2v95	5.0109	3h8b	5.92	3q6z	2.229	3cct	6.26	3mss	2.567	2wgj	2.01	4lko	2.07	2wbg	7
2qm9	2.05	3ery	4.29	3own	7.17			3slz	2.05	2vfk	7.6953	3hit	5.08	3q71	2.156	3cdb	3.898	3n0h	2.385	2wk6	4.78	4mlu	3.16	2v8w	7
2qmj	3.62	3f70	2.74	3p2e	3.1			3sm2	2.15	2vhj	2.9926	3hv8	3.14	3qaa	3.256	3cf8	5.029	3n3g	7.142	2wkz	3.7	4n5d	2.51	2uxz	7
2qnn	2.29	3f78	2.45	3p8z	4.92			3t3c	2.4	2vjx	2.4091	3i25	11.16	3qfy	2.898	3cfn	5.643	3nee	2.934	2wn9	3.86	4n7m	3.51	2r9x	7
2qnq	2.05	3f8c	5.9	3p9t	3.42			3t60	3.66	2vmf	3.4359	3i73	10.62	3qkd	3.475	3cft	2.9	3neo	2.253	2wnj	2.03	4np9	2.95	2qi5	7
2qtg	4.21	3f8f	4.71	3pb3	2.82			3t6b	3.03	2vo5	5.0899	3ie3	3.29	3qoz	2.353	3cj5	2.543	3nex	2.284	2wyg	2.5	4rsk	4.5	2qhd	7
2qtt	2.53	3fv3	6.28	3pju	4.22			3tmk	3.95	2vot	2.9113	3ies	3.34	3qx8	7.377	3coy	7.389	3nu6	3.988	2wzm	2.02	6upj	5.88	2pu2	7
2r0h	6.53	3fvh	2.83	3ppm	5.49			3uil	3.44	2vt3	2.9033	3ifl	4.76	3qx9	4.179	3cyw	3.532	3nuo	2.561	2x0y	5	2f2h	NP	2oxn	7
2r0z	6.78	3g2z	3.59	3prs	3.1			3umq	5.39	2vw1	4.7831	3imc	4.03	3r0y	5.723	3d1y	2.072	3nw3	3.221	2x6x	4.81	3k1j	NP	2ov4	7
2r3w	2.22	3g32	2.29	3pww	2.12			3upk	2.76	2vyt	2.0943	3iob	3.15	3rdv	7.537	3d20	3.336	3o4k	9.674	2xb7	4.8			2o4n	7
2r43	2.68	3g34	4.59	3q6z	5.55			3upv	4.67	2w5g	5.9248	3iod	2.66	3rt4	8.378	3d6o	2.077	3o5n	5.138	2xde	4.84			2ieo	7
2r5p	2.89	3gcp	6.17	3q71	5.51			3uri	5.53	2w8j	5.1182	3iss	3.46	3rux	4.287	3d6p	6.283	3o5x	6.147	2xdx	2.17			2i2c	7
2r9x	2.65	3gdt	2.34	3qaa	2.82			3usx	2.43	2w8w	3.6215	3iub	3.56	3sio	4.485	3d6q	3.467	3o6m	3.441	2xjx	3.3			2ha6	7
2rkf	3.94	3gn7	2.02	3qdd	2.5			3uxd	3.53	2w9h	3.3442	3iue	2.83	3slz	7.268	3d78	2.176	3o9e	3.57	2xn3	2.19			2ha5	7
2rkg	2.64	3gnw	5.29	3qfz	2.22			3uyr	4.64	2wb5	6.1995	3ivc	2.8	3sm2	2.87	3d7b	2.8	3obq	2.845	2xnb	5.2			2h21	7
2std	6.18	3gr2	6.81	3qox	3.64			3uzj	4.33	2wbg	3.8991	3ivx	8.03	3spf	3.946	3d8y	6.278	3obu	4.298	2xog	2.4			2gss	7
2uxz	4.03	3gs6	3.93	3qx8	7.09			3v78	5.32	2wc3	4.4757	3iw5	5.15	3sut	3.139	3d8z	7.301	3obx	2.073	2xye	3.4			2cej	7
2uy0	5	3gss	5.11	3qx9	5.8			3v7t	2.75	2wc4	3.9325	3jup	4.22	3suu	2.708	3djp	7.649	3odu	2.979	2xyf	4.11			2c80	7
2uy4	3.35	3gtc	2.08	3qxt	4.69			3vje	2.11	2wcg	3.958	3jy0	5.7	3t3c	3.956	3djq	6.076	3ok9	2.289	2y5h	2.2			2bqv	7
2uyq	2.97	3gus	5.55	3qxv	4.87			3vtr	2.43	2web	7.8527	3jzg	6.37	3t60	2.139	3djv	7.229	3ov1	2.961	2y8c	4.73			2avs	7
2v2q	6.17	3gvu	5.1	3r0y	5.73			3vvy	3.59	2wec	4.4259	3jzh	6.97	3ta0	2.959	3djx	5.179	3owj	3.604	2y9g	2.33			2avo	7
2v2v	5.35	3gx0	4.34	3r1v	5.39			3zk6	3.62	2wer	2.758	3k4d	2.35	3tmk	6.53	3dk1	3.423	3ozp	3.551	2yb0	3.65			2aqu	7
2v57	4.31	3h1x	4.36	3rdv	5.7			3zm9	2.46	2wjg	3.6562	3k4q	2.08	3ueu	2.601	3drf	3.559	3p2e	3.838	2ybu	2.9			2ans	7
2v8w	2.93	3h5b	2.29	3rlb	4.97			3zsq	2.16	2wk6	4.9507	3kdb	10.08	3ug2	5.978	3drg	3.238	3p3s	2.296	2yel	3.61			1z71	7
2vb8	5.24	3h78	2.29	3rlp	3.48			3zsy	2.14	2wkz	4.2209	3kdc	3.82	3uil	3.958	3dri	3.224	3p9m	5.132	2yfx	2.36			1w5w	7
2vhj	2.76	3h89	6.4	3rm4	5.96			4a6c	2.46	2wl0	12.5482	3kdd	10.64	3umq	5.356	3dsz	3.472	3p9t	5.814	2yim	6.19			1uwt	7
2vkm	3.67	3h8b	6.24	3rsx	2.72			4a6l	2.2	2wn9	2.3766	3kgp	2.72	3upv	2.29	3dxg	5.489	3pb3	3.597	2yix	2.03			1pxo	7
2vmf	3.19	3hit	5.04	3rt4	8.54			4b3c	2.32	2wuf	5.9312	3kjd	5.61	3uri	9.877	3dxh	3.469	3ppm	3.211	2yxj	4.46			1oz0	7
2vo4	4.83	3hkw	4.59	3rux	8.69			4b9z	3.67	2wzm	11.4907	3kku	3.51	3usx	5.639	3e3c	2.137	3prs	2.329	2zc9	3.2			1nny	7
2vt3	6.11	3hl7	6.62	3s2v	2.19			4da5	2.55	2x6x	5.8208	3kmy	2.06	3uyr	6.021	3e6y	8.762	3pwd	5.725	2zy1	3.19			1nl9	7
2vvs	2.44	3hv8	4.27	3s3v	3.43			4dbm	2.18	2xb7	9.8755	3l3l	2.54	3v2q	12.627	3e85	4.362	3pxf	3.852	2zz1	3.47			1m5w	7
2vxn	3	3i25	7.97	3s5y	2.1			4ddk	3.14	2xde	5.8449	3l4u	2.88	3v4t	3.732	3eax	10.385	3q6z	2.484	3a2o	3.82			1lkk	7
2vyt	4.32	3i73	6.6	3s6t	2.43			4der	3.58	2xdx	3.7324	3l4x	2.08	3v78	5.355	3eb1	6.136	3qfy	3.366	3a6t	3.8			1izh	7
2w5g	6.71	3ie3	3.48	3slz	2.72			4des	2.97	2xii	2.8962	3l4y	2.14	3vvy	3.199	3ed0	5.292	3qfz	2.362	3aaq	3.08			1hvi	7
2w9h	4.18	3ifl	3.17	3spf	3.62			4det	2.13	2xjj	6.6246	3lgs	2.05	3zk6	4.712	3eeb	2.275	3qgw	6.37	3afk	6.89			1hvh	7
2wbg	2.62	3ime	7.39	3sut	4.74			4dew	5.96	2xm1	2.6798	3lvw	4.02	3zll	2.399	3efs	2.132	3qkd	2.921	3ai8	3.07			1hos	7
2wc3	2.5	3isj	2.59	3suu	4.57			4djq	2.77	2xmy	3.9099	3lzz	2.92	3zsq	3.385	3eko	5.119	3qoz	3.411	3aid	2.06			1gnm	7
2wc4	2.96	3iss	3.66	3sxf	6.45			4djr	2.49	2xog	2.4716	3m3e	2.14	4a6b	6.297	3ekr	3.313	3qps	2.024	3ap4	4.3			1gar	7
2web	3.66	3iub	2.23	3t1l	2.76			4djx	2.1	2xpk	9.8442	3m3o	2.14	4ad3	5.131	3ekt	8.99	3qqa	2.515	3arp	3.01			1g7g	7
2wec	6.44	3iw6	4.38	3t2w	2.62			4dy6	4.68	2xye	12.3586	3m8u	2.86	4az6	2.271	3ekv	9.039	3qx8	6.78	3arq	3.5			1g74	7
2whp	2.48	3jdw	3.41	3t3u	5.34			4e67	4.42	2xyf	11.9641	3mam	5.58	4azb	3.014	3ekw	2.2	3r0y	6.484	3aru	2.54			1ec2	7
2wl0	5.8	3jyr	5.27	3t6b	2.14			4emf	2.84	2y8c	2.3405	3miy	3.59	4b9z	3.257	3el1	11.204	3r1v	8.144	3arv	5.29			1ec0	7
2wn9	6.25	3jzh	5.01	3ta0	6.88			4emr	3.13	2y9g	5.9404	3mss	4.47	4ddm	4.159	3el9	10.449	3r4m	2.554	3arw	4.36			1drv	7
2wnc	2.88	3k02	4.94	3tao	2.05			4er1	2.56	2ya6	5.0059	3n0h	2.73	4de2	6.131	3evd	2.792	3rdv	6.738	3ary	3.15			1det	7
2wr8	4.53	3k5v	2.33	3tmk	3.76			4er2	3.46	2ya7	5.3752	3n3g	8.93	4de3	2.01	3f70	4.661	3rm4	5.765	3b26	2.25			1ct8	7
2wuf	2.03	3kgt	2.88	3tzm	5.57			4etz	2.44	2ybu	3.9888	3n8k	2.54	4det	2.187	3f78	2.23	3rm9	5.922	3b3x	2.14			1c70	7
2wzm	2.25	3kgu	3.56	3u10	6.65			4eu0	2.14	2yek	5.8718	3ng4	2.24	4dew	4.518	3f8c	3.417	3ru1	4.678	3b4p	4.54			1ado	7
2x6x	3.42	3kjd	3.37	3uex	2.33			4ew2	2.16	2yel	3.2576	3nhi	4.49	4djo	4.268	3f8f	5.699	3rv8	5.207	3b5j	6.99			1a9m	7
2xb7	4.98	3kku	3.07	3ug2	3.32			4ew3	2.34	2zb1	10.6994	3nht	2.36	4djq	3.574	3fhb	2.063	3s0b	2.66	3b7j	3.22			1a4w	7
2xdk	4.04	3kyq	4.68	3uil	3.23			4ezx	5.83	2zcs	10.1644	3nsn	3.72	4djr	3.77	3fj7	4.198	3s6t	3.605	3bbb	5.65			4ly9	6
2xdx	3.09	3l4v	5.3	3ujb	4.45			4ezz	3.52	2zjw	2.7922	3nw3	3.5	4dy6	3.207	3fjg	4.409	3s8l	3.083	3bf1	6.7			4lvt	6
2xjx	2.05	3l4x	5.3	3umq	2.5			4f7v	3.1	2zn7	2.2148	3o5n	3.46	4e67	4.104	3fvh	5.44	3s8n	3.205	3bgc	2.02			4loh	6
2xmy	2.56	3l4y	5.22	3upk	5.24			4fnn	3.11	2zx8	10.1619	3o5x	6.11	4ef6	4.668	3fzy	2.271	3s8o	3.591	3brn	3.01			4jym	6
2xnb	5.54	3l4z	5.24	3upv	4.81			4fys	4.82	2zz1	2.287	3o6m	4.75	4ejl	2.499	3g08	5.832	3spf	6.909	3buf	2.32			4jfm	6
2xog	4.94	3lbz	4.16	3uri	4.78			4gah	2.79	3a2o	10.4033	3oaf	2.22	4emf	2.115	3g2z	3.616	3st5	3.175	3bv9	3.94			4i9u	6
2xye	3.72	3ldp	3.27	3usx	6.43			4gid	2.56	3aaq	8.9009	3obu	2.53	4emr	3.413	3g32	4.581	3sut	3.873	3bva	3.48			4i9h	6
2xyf	10.28	3ldq	3.67	3uyr	3.7			4h3f	2.23	3acw	7.2298	3obx	3.21	4er1	6.147	3g34	4.855	3suu	2.163	3bvb	3.3			4hy1	6
2y5f	4.85	3lgs	2.45	3v4t	3.72			4h75	4.29	3acx	5.2542	3ov1	2.86	4er2	2.667	3g35	7.975	3t6b	3.771	3bze	6.11			4hla	6
2y7p	3.69	3lpp	5.21	3v51	4.76			4hj2	2.15	3adv	5.2661	3owj	4.18	4etz	5.211	3gdt	4.106	3t70	3.917	3bzf	4.57			4gny	6
2y8c	2.08	3lvw	2.15	3v5p	4.24			4hla	2.23	3afk	5.4091	3ozj	3.99	4eu0	6.703	3ggu	9.06	3tb6	2.821	3c2f	2.5			4b3b	6
2y9g	5.59	3lzz	2.92	3v5t	5.79			4hp0	2.89	3ai8	2.8797	3p2e	9.23	4ewn	2.399	3gi4	10.695	3tf6	3.589	3c2r	2.01			4ahs	6
2ybu	2.65	3m3c	5.68	3v78	5.42			4i9h	2.67	3aid	2.2453	3p8z	2.26	4ezr	4.443	3gi5	10.813	3u3u	2.243	3c39	2.25			4ad3	6
2yfx	2.66	3m3e	6.33	3v7t	3.37			4ieh	3.76	3ap4	4.9321	3p9m	2.12	4ezx	6.187	3gi6	4.269	3ug2	2.169	3c79	2.65			4a6b	6
2yim	6.03	3m3o	6.33	3vhk	5.3			4isu	2.2	3arp	9.1173	3p9t	2.4	4ezz	3.181	3gqz	4.888	3uil	4.054	3c8e	4.42			3zsy	6
2yk1	4.6	3m3z	2.25	3vje	2.05			4j7e	3.6	3arq	9.0324	3pb3	7.61	4f7v	5.608	3gr2	3.835	3umq	5.64	3ccw	3.05			3s8n	6
2yki	8.13	3mam	3.35	3vtr	2.28			4jc1	3.05	3aru	5.9474	3pju	2.09	4fcf	3.254	3gs6	4.142	3upk	4.574	3cda	2.07			3rux	6
2zb1	8.69	3mhw	2.41	3vvy	3.38			4jfm	2.62	3arv	5.2589	3ppm	2.55	4fnn	5.262	3gss	3.857	3upv	4.978	3cf8	2.7			3ru1	6
2zcs	2.08	3mss	2.56	3w37	2.84			4jwk	2.33	3arx	10.0329	3q1x	2.95	4fys	3.365	3gtc	7.759	3uri	5.129	3cj5	5.09			3pxf	6
2zjw	3.55	3n0h	2.75	3zk6	5.14			4jx9	2.52	3ary	5.4974	3q6z	2.03	4fzj	3.87	3gus	3.575	3usx	4.687	3ckp	3.99			3pww	6
2zy1	2.01	3n3g	2.49	3zll	2.39			4jym	4.12	3b2q	8.2308	3q71	2.11	4g8v	3.843	3guz	2.228	3uyr	4.63	3cow	2.11			3pb3	6
3a5y	5.41	3nes	2.63	3zln	6.17			4k55	2.51	3b3x	2.2083	3qbc	4.41	4g8y	3.555	3gvb	5.503	3uzj	3.662	3coy	4.03			3nq9	6
3a6t	2.52	3nht	2.93	3zlr	8.6			4kcx	2.37	3b50	4.1162	3qfy	3.52	4g90	3.463	3gx0	5.821	3v4t	2.797	3coz	3.36			3nq3	6
3aaq	6.37	3nq3	2.87	3zm9	8.44			4lar	2.55	3b5j	2.9398	3qfz	2.35	4gah	6.794	3h1x	5.645	3v78	6.418	3cyw	3.44			3mxe	6
3adv	3.25	3nq9	2.58	3zsx	2.8			4lkk	2.17	3b7j	6.3508	3qgy	3.65	4gny	3.407	3h30	3.512	3v7t	3.741	3cyx	4.16			3lbz	6
3ai8	3.69	3nsn	6.05	3zsy	2.74			4lvt	2.36	3bbb	6.895	3qkd	2.82	4h75	8.196	3h89	13.233	3vtr	2.57	3d1x	4.55			3l4y	6
3ap4	3.03	3nu9	2.41	4a6l	3.14			4mlu	4.27	3bf1	9.3799	3qqa	2.55	4hdf	3.237	3hb4	2.058	3vvy	5.075	3d6o	2.8			3l4v	6
3arp	5.21	3nw3	3.73	4ajl	3.6			4np9	2.25	3bgb	3.9043	3qx8	9.04	4hj2	4.916	3hek	4.051	3zk6	6.388	3d6p	3.4			3l4u	6
3arq	3.64	3nyx	4.37	4arw	2.21			4sga	2.45	3bra	8.1758	3qx9	8.11	4hla	2.077	3hk1	3.426	3zll	2.347	3d6q	2.83			3k4d	6
3arr	2.71	3o5x	5.47	4b1j	6.46			4tmk	4.28	3buf	6.6027	3r0y	2.53	4hy1	5.999	3hl7	2.253	3zqe	2.126	3d7b	2.36			3gqz	6
3aru	3.86	3oaf	2.95	4b34	2.01			5er1	2.94	3bug	2.4451	3rdv	4.8	4hym	5.089	3hv8	4.388	3zsq	4.995	3d8y	3.54			3gi5	6
3arv	6.8	3obq	6.11	4b9z	5.86			5er2	4.69	3bv9	5.3865	3rm4	2.79	4i8n	2.145	3i73	6.765	3zsx	6.446	3d8z	3.03			3ekw	6
3arw	5.97	3obu	5.89	4bny	3.16			5tmp	3.93	3bva	10.8815	3rux	4.05	4i9u	3.295	3i7e	3.325	3zsy	5.935	3d91	4.7			3ekt	6
3arx	2.46	3obx	3.47	4d8z	2.47					3bvb	8.0623	3s2v	5.03	4ieh	2.208	3ie3	3.648	3zv7	4.044	3da9	5.79			3efs	6
3ary	4.6	3ov1	2.66	4daf	2.44					3bxf	3.2424	3s8l	2.57	4ijh	5.407	3ifl	2.94	4a6l	2.322	3djp	3.97			3bgb	6
3axz	4.9	3owj	5.13	4db7	2.48					3c2f	5.0024	3s8n	2.64	4j7e	3.918	3iod	2.76	4ahr	2.051	3djq	5.85			3b2q	6
3b27	2.03	3ozj	4.15	4ddy	3.22					3c2o	2.4324	3s8o	2.76	4jc1	4.779	3ioe	3.667	4ahs	2.198	3djx	5.36			3ap4	6
3b2q	4.29	3ozp	4.58	4de3	5.5					3c2r	2.0698	3spf	3.3	4jfm	4.423	3isj	2.355	4arw	2.266	3drf	2.25			3afk	6
3b3x	2.54	3p2e	2.16	4der	2.38					3c2u	2.4322	3suu	2.31	4jkw	2.08	3iss	3.923	4azb	2.469	3drg	4.12			2zy1	6
3b5j	5.47	3pb3	2.91	4des	2.06					3c8e	5.4983	3suv	5.17	4jx9	2.208	3iub	2.97	4b3c	2.486	3dri	6.68			2y9g	6
3b7j	4.26	3pju	3.98	4dli	3.36					3cct	2.5199	3t64	4.44	4k55	5.784	3iw5	3.877	4b9z	3.301	3dsz	4.56			2xb7	6
3bbb	3.94	3ppm	4.23	4dq2	5.84					3ccw	8.394	3t6b	2.82	4kcx	2.534	3iw6	2.157	4br3	2.998	3dxg	4.8			2wl0	6
3bf1	3.9	3prs	5.95	4dy6	2.61					3cd7	2.5162	3t70	3.85	4mlu	5.85	3jdw	4.236	4ceb	4.922	3dxh	3.79			2wkz	6
3bfu	4.57	3pww	3.24	4e1k	4.43					3cdb	9.2863	3tb6	2.93	5er2	4.815	3jrs	3.812	4daf	2.888	3e6y	4.8			2vvs	6
3bqc	3.38	3q6z	2.99	4e67	2.38					3cf8	4.8863	3tmk	6.25	5tmp	7.883	3juo	5.899	4dbm	4.153	3e85	2.13			2uy0	6
3brn	2.15	3qfy	3.29	4ek9	4.21					3cfn	3.9421	3tza	4.28	1r0p	NP	3juq	5.765	4der	6.871	3eax	5.41			2r9w	6
3buf	2.54	3qps	7.44	4emf	3.06					3cft	4.4551	3ug2	2.65	4loi	NP	3jvs	2.112	4des	6.156	3eb1	3.91			2r0h	6
3bv9	3.54	3qqa	3.79	4emr	2.99					3cj5	2.4404	3uil	3	4loh	NP	3jzg	9.063	4det	6.378	3ekp	4.21			2qfo	6
3bva	9.44	3qx8	5.18	4etz	2.94					3ckp	4.0219	3umq	5.09	1r6n	NP	3jzh	7.675	4dew	6.761	3ekt	2.47			2ole	6
3bzf	5.96	3qx9	2.29	4eu0	2.9					3cow	5.0197	3upk	2.19	3vtr	NP	3k4d	2.719	4djo	2.6	3ekw	3.36			2o0u	6
3c2f	4.91	3qxv	2.26	4ezr	7.19					3coy	4.7415	3upv	4.32	1bxo	NP	3k5v	2.777	4djq	3.888	3el1	4.69			2jiw	6
3c8e	4.89	3r0y	6.12	4ezx	4.57					3coz	5.9353	3usx	2.78	1nw5	NP	3k8o	2.589	4djr	2.459	3el9	5.42			2j7g	6
3cf8	3.67	3r1v	5.75	4f3c	4.08					3ctt	7.6046	3uyr	3	1bxq	NP	3k99	6.298	4dy6	3.147	3eqr	2.01			2j7f	6
3cfn	3.22	3rm4	6.11	4f7v	3.14					3cyw	8.1641	3v4t	3.69	1nvr	NP	3kku	3.921	4e67	4.502	3ery	5.38			2j7e	6
3cj5	3.07	3rux	7.1	4fcq	4.65					3d6o	2.7489	3v7t	3.15	3lpp	NP	3kmx	3.377	4ej8	2.267	3f68	2.4			2j7d	6
3ckp	2.8	3s56	3.94	4ffs	4.82					3d6p	5.1525	3veh	5.55	1f5k	NP	3kyq	6.685	4ejl	2.458	3f70	4.07			2j79	6
3coz	2.55	3s6t	3.28	4flp	5.25					3d6q	3.4071	3vje	7.63	4np9	NP	3lbj	4.278	4emf	2.459	3f8c	5.14			2i4w	6
3cyw	2.36	3s8n	2.16	4fnn	4.74					3d7b	2.7347	3vtr	2.67	2hw2	NP	3ldp	2.167	4emr	2.48	3f8f	4.76			2hmu	6
3cyx	2.97	3slz	2.24	4fs4	4.14					3d8y	3.4077	3vvy	4.99	3hmo	NP	3ldq	2.674	4er1	4.893	3ffg	5			2hah	6
3d1x	4.03	3spf	4.07	4fsl	4.31					3d8z	3.2858	3vw1	2.09	2h21	NP	3lpk	9.497	4er2	2.499	3fhb	3.73			2gst	6
3d1y	4.45	3suu	7.39	4fys	3.95					3da9	6.9665	3w37	3.01	3g31	NP	3lvw	3.766	4etz	2.22	3fjg	2.31			2fxs	6
3d1z	4.05	3t1l	2.47	4fzj	4.45					3dhv	3.7018	3w9k	2.3	3l4u	NP	3lzz	4.146	4ezr	2.866	3fv3	5.31			2bpv	6
3d20	3.76	3t6b	2.72	4g0q	3.29					3djk	3.0711	3zk6	3.59	3l4v	NP	3m3e	5.693	4ezx	7.029	3fvh	3.62			1zog	6
3d6o	3.4	3ta0	2.31	4g0y	3.72					3djp	6.291	3zlr	5.92	4ksy	NP	3m3o	6.957	4f7v	4.798	3g08	3.9			1xws	6
3d6p	2.45	3tf6	2.86	4g0z	4.32					3djq	5.1701	3zsq	3.01	3l4y	NP	3m8u	6.322	4fcf	4.59	3g19	3.26			1x39	6
3d6q	3.16	3tmk	7.68	4g8v	3.14					3djx	3.1555	3zsx	3.18	3l4x	NP	3mam	3.267	4fcq	4.84	3g2z	2.35			1w5y	6
3d7b	2.97	3tu7	2.39	4g8y	3.86					3dk1	7.6373	3zv7	3.37	1fkf	NP	3mss	9.683	4fnn	6.386	3g30	2.26			1tsy	6
3d8y	2.92	3tza	5.43	4gah	10.7					3drf	7.3067	3zze	5	3l4z	NP	3mxd	5.816	4fys	4.696	3g32	2.11			1sgu	6
3d8z	3.26	3tzm	5.32	4gfo	2.38					3drg	2.6261	4a6l	6.86			3mxe	5.512	4fzj	5.796	3g34	2.75			1rpf	6
3d91	4.29	3ueu	3.03	4ggz	2.8					3dri	4.107	4acc	9.72			3n3g	6.164	4gah	3.605	3gdt	2.68			1r4w	6
3djk	2.61	3ug2	2.18	4gq4	2.6					3dsz	2.1693	4ad3	4.3			3nes	3.97	4gfo	6.294	3gi5	5.47			1pyn	6
3djp	2.37	3uil	4.46	4gu9	2.64					3dxg	3.3714	4ad6	6.04			3nex	8.758	4gg7	3.257	3gi6	2.22			1pgp	6
3djq	5.65	3umq	5.98	4h3f	3.88					3dxh	4.3372	4ahr	5.88			3nq3	2.265	4gu6	2.695	3gnw	3.38			1nja	6
3djv	2.65	3uod	2.16	4h3g	5.24					3dzt	2.7497	4aje	4.08			3nq9	2.247	4h75	6.511	3gs6	2.2			1m7i	6
3djx	2.96	3upk	3.39	4h42	3.47					3e3c	8.5188	4ara	3.51			3nsn	4.313	4hj2	2.319	3gss	5.82			1m2p	6
3dk1	2.58	3upv	3.73	4h75	4.2					3e85	2.3183	4arb	2.24			3o5n	5.027	4hla	3.963	3gst	3.89			1lbk	6
3dp9	3.98	3uri	7.6	4ha5	2.63					3eax	8.6192	4arw	2.28			3o5x	6.117	4hym	4.835	3gtc	3.71			1kzn	6
3drf	9.65	3usx	4.81	4hj2	5.16					3eb1	8.329	4b2l	5.28			3o75	2.214	4i54	3.078	3gus	5.35			1hii	6
3drg	3.95	3uyr	3.51	4hp0	2.26					3eeb	5.9129	4b6r	3.17			3o9d	3.554	4i8n	4.042	3gx0	4.54			1gvw	6
3dri	5.01	3uzj	3.99	4hy1	6.17					3efs	3.0401	4b74	4.46			3obq	2.733	4i8z	2.005	3h1x	6.17			1g85	6
3dsz	3.74	3v4t	2.54	4hym	6.54					3ekt	7.7859	4b9z	2.08			3obu	2.064	4ieh	2.181	3h89	4.29			1fv0	6
3dxg	3.68	3v78	5.4	4i8n	3.39					3ekv	10.1696	4br3	2.82			3odu	5.007	4ih5	2.198	3h8b	8.29			1fq5	6
3dxh	3.64	3v7t	2.74	4j7e	3.81					3el1	12.2199	4ceb	4.07			3ok9	3.426	4iid	4.047	3hit	5.99			1fpc	6
3e85	3.91	3vtr	3.41	4j93	2.23					3el4	4.0349	4cgi	4.08			3owj	5.282	4j7e	3.993	3hkw	3.86			1fm9	6
3eax	5.4	3vvy	4.59	4jal	5.21					3el5	9.0139	4d8z	3.27			3p9m	5.778	4jc1	3.093	3i25	10.02			1fhd	6
3eb1	6.35	3w37	5.36	4jh0	2.28					3ery	13.2379	4daf	2.94			3p9t	6.026	4jfm	4.466	3i73	7.96			1ebz	6
3ed0	5.99	3zk6	7.03	4jkw	2.02					3evd	7.971	4db7	2.82			3pju	4.743	4jfs	2.02	3ie3	5.71			1ebw	6
3efs	6.6	3zll	2.21	4jv6	2.1					3f68	2.5063	4dbm	8.19			3prs	4.425	4jkw	4.436	3ies	2.05			1dzk	6
3ekp	2.16	3zln	6.2	4jwk	2.84					3fas	3.9114	4ddm	2.19			3pwd	5.808	4jwk	2.493	3ifl	6.09			1d9i	6
3ekt	2.77	3zlr	4.55	4jyb	6.08					3fv3	6.0047	4dds	9.6			3pwm	3.491	4jx9	5.413	3ikg	2.62			1d4h	6
3ekw	3.08	3zm9	4.16	4k55	4.05					3fvh	5.3674	4ddy	8.77			3pww	10.402	4jyc	5.114	3imc	5.17			1d3p	6
3el1	4.87	3zqe	2.4	4k9y	6.8					3fzy	8.0994	4de2	2.79			3pxf	5.789	4jym	2.413	3ime	4.48			1c4u	6
3el4	2.03	3zsq	4.74	4kcx	3.26					3g08	9.6868	4de3	7.87			3q6z	2.238	4k18	4.233	3iod	4.73			1c2t	6
3el9	7.05	3zsx	4.44	4km2	3.25					3g0i	2.8149	4det	4.85			3qfy	3.161	4k3h	5.578	3isj	2.9			1bxo	6
3ery	6.33	3zv7	3.04	4ksy	7.4					3g2z	3.2362	4dew	6.88			3qgw	2.634	4k55	4.962	3iss	3.07			1bhx	6
3evd	5.39	4a6b	3.68	4loh	2.19					3g30	3.7994	4djq	2.94			3qgy	2.54	4kcx	2.274	3ivg	2.34			1afl	6
3f3t	5.81	4a6l	3.11	4loo	3.64					3g32	3.6465	4dko	7.51			3qkd	13.621	4lvt	2.8	3iw5	2.71			1aaq	6
3f3u	6.86	4ad3	3.53	4ly9	4.32					3g34	2.857	4dkp	2.83			3qoz	9.568	4lxd	3.232	3jvs	2.11			1a1e	6
3f70	2.5	4ahu	2.07	4mlu	2.79					3g35	5.3019	4dld	3.75			3qqa	7.873	4ly9	4.862	3jy0	2.22			4mr3	5
3f78	2.39	4arw	2.23	4mr3	2.56					3gbe	3.6254	4dy6	2.65			3qx9	3.105	4mlu	3.24	3jzg	6.06			4loi	5
3f8c	6.87	4asj	3.83	4n5d	3.06					3gdt	3.7703	4e67	4.17			3r0y	6.575	4n7m	3.475	3jzh	8.88			4ksy	5
3f8f	4.31	4azg	3.56	4tmk	4.2					3gi4	8.142	4efk	2.72			3r1v	8.189	4np9	2.075	3k00	2.74			4i8z	5
3fat	4.38	4b2l	2.52	4ts1	3.63					3gqz	4.0353	4ejl	2.66			3r4m	2.541	4rsk	2.593	3k02	3.3			4h42	5
3fv3	6.72	4b34	2.34	5er1	2.1					3gr2	3.8097	4emr	2.41			3roc	10.947	4tmk	6.459	3kdc	2.71			4gq4	5
3fvh	3.42	4b35	3.94	5er2	2.02					3gs6	2.1081	4er2	4.97			3rsx	6.018	5er2	4.174	3kdd	3.98			4gid	5
3g2z	5.33	4b3b	2.22	5tmp	2.6					3gss	9.8377	4ew2	4.97			3ru1	6.611	5tmp	7.645	3kgt	2.16			4g8v	5
3g34	5.5	4b3c	2.3							3gst	4.9544	4ew3	5.01			3rv8	3.254	1e4h	NP	3kku	3.57			4g0z	5
3gcp	5.69	4b73	6.22							3gus	3.2625	4ezr	3.89			3s2v	2.165			3kmy	2.33			4flp	5
3gcu	8.36	4b9z	6.32							3gx0	5.8959	4f3k	3.56			3slz	7.664			3kyq	2.65			4ew3	5
3gdt	3.37	4bi6	3.82							3h1x	6.1879	4f7v	3.51			3sm2	3.031			3lbj	5.34			4ejl	5
3gi4	2.27	4bi7	3.43							3h5b	8.9456	4fcq	4.78			3spf	3.883			3lbz	4.38			4efk	5
3gi5	2.92	4bny	6.37							3h89	11.1587	4fht	4.16			3sut	3.937			3ldq	2.91			4djr	5
3gi6	2.75	4bqg	2.2							3h8b	5.192	4fnn	3.56			3suu	2.395			3lpi	2.97			4djp	5
3gqz	2.22	4br3	2.57							3hit	5.6084	4fzj	4.48			3t3c	2.442			3lpk	2.84			4djo	5
3gr2	4.46	4ceb	2.29							3huc	5.9426	4g0p	4.69			3t6b	4.895			3lvw	2.95			4der	5
3gs6	5.12	4cgi	2.11							3hv8	10.6509	4g0q	4.24			3ta0	3.089			3lzv	3.9			4de5	5
3gsm	2.31	4dbm	2.94							3i25	9.753	4g0y	3.5			3u15	2.199			3lzz	3.8			4de3	5
3gss	5.47	4ddk	4.43							3i6o	11.9752	4g0z	3.94			3u6i	2.62			3m3c	5.53			4daf	5
3gtc	4.33	4ddm	5.1							3i73	10.0841	4g4p	3.9			3u8k	3.822			3m3e	5.24			4ahr	5
3gus	5.68	4de5	3.43							3ie3	10.9951	4g8v	2.19			3ueu	4.465			3m3o	7.06			3zqe	5
3gx0	4.41	4der	6.5							3ifl	4.0542	4gfo	6.29			3uev	2.018			3m3z	2.46			3zm9	5
3h1x	5.04	4des	3.3							3imc	4.6377	4gg7	9.59			3ug2	4.127			3m8u	3.22			3w37	5
3h30	5.07	4det	2.15							3iod	5.0936	4gid	4.65			3uil	4.556			3mam	2.06			3ueu	5
3h5b	3.42	4dew	3.15							3iue	3.7282	4gq4	4.66			3umq	5.658			3mf5	3.23			3tf6	5
3h78	2.29	4djp	4.32							3ivc	7.4926	4gu9	3.5			3upv	4.104			3miy	3.25			3t70	5
3h89	6.08	4dko	2.03							3iw5	7.0137	4h42	2.09			3uri	11.753			3ms9	2.96			3sut	5
3h8b	7.59	4dld	4.75							3jvs	2.3821	4h75	3.34			3usx	7.591			3mss	2.09			3s56	5
3hb4	2.09	4dy6	4.91							3jyr	2.4954	4hj2	4.48			3uyr	12.17			3mxd	3.97			3s2v	5
3hit	5.19	4e67	5.53							3jzh	8.0955	4hy1	6.95			3v2n	2.936			3mxe	3.79			3rm4	5
3hl7	6.65	4ej8	2.14							3k4d	3.1572	4hym	6.15			3v2q	11.335			3myg	2.03			3qps	5
3huc	4.54	4emf	2.84							3k4q	5.4594	4hzm	2.98			3v4t	3.984			3n0h	4.72			3qoz	5
3hv8	4.24	4emr	4.25							3kdb	13.1897	4i8n	4.44			3v78	5.142			3n3g	6.68			3qaa	5
3i25	10.27	4er1	5.97							3kgp	4.2911	4i8x	5.14			3vvy	4.9			3nex	2.72			3ozj	5
3i73	6	4er2	3.34							3kku	3.5902	4i9h	4.21			3zk6	7.089			3ng4	2.09			3ok9	5
3i7e	2.5	4etz	5.95							3kmy	2.4104	4i9u	4.15			3zll	3.958			3nq3	2.94			3o9e	5
3ie3	5.82	4eu0	6.94							3kyq	7.2413	4ih5	2.71			3zqe	2.785			3nsn	2.59			3nu9	5
3ies	3.74	4ew2	4.87							3l4u	7.3983	4iid	3.32			3zsq	4.916			3nu5	2.64			3nex	5
3ifl	5.22	4ew3	2.92							3l4v	2.1464	4io2	4.15			3zsx	4.34			3nu6	3.6			3mxd	5
3ime	7.38	4ezr	4.29							3l4x	2.4273	4isu	2.06			3zsy	4.674			3nu9	2.18			3m3z	5
3iob	2.53	4ezx	7.97							3l4y	6.4964	4j28	3.35			3zv7	3.835			3nw3	4.41			3m3c	5
3iod	4.41	4ezz	3.66							3lbj	6.3123	4j7e	4.43			4ad3	6.064			3o4k	7.34			3lpp	5
3ipu	2.55	4fnn	2.58							3lbz	4.3068	4jfk	2.28			4ahr	4.785			3o5n	5.11			3lpk	5
3isj	2.93	4fys	3.05							3ldq	2.8736	4jh0	2.14			4ahs	2.817			3o5x	4.65			3lbj	5
3iss	3.82	4fzj	7.02							3lpk	3.5195	4jwk	2.46			4aj4	8.225			3o6m	7.58			3kgu	5
3iub	2.63	4g0q	3.24							3lpp	7.4243	4jx9	5.38			4aje	4.56			3o99	2.09			3kgt	5
3jdw	4.1	4g5f	2.73							3lzu	8.3197	4k0y	4.68			4aji	4.631			3o9e	4.45			3kdd	5
3jrs	3.89	4gah	4.51							3lzz	3.8675	4k3h	5.56			4azb	3.672			3obq	8			3k5v	5
3jvs	2.09	4gid	5.03							3m3e	5.4976	4kcx	2.79			4b3d	2.403			3obu	4.47			3jvs	5
3jyr	7.29	4gq4	2.59							3m3o	3.2398	4km2	2.53			4b9z	4.368			3obx	5.01			3iue	5
3jzg	3.37	4h3f	2.05							3m8u	9.0315	4kqp	3.94			4bqg	2.013			3odu	4.88			3isj	5
3jzh	6.27	4h42	2.34							3mam	3.0892	4loi	7.21			4br3	10.812			3ok9	5.44			3ime	5
3k00	2.17	4hj2	5.05							3mhw	3.8427	4lvt	2.21			4daf	2.899			3ov1	2.31			3hl7	5
3k02	5.92	4hy1	2.42							3mxd	8.1436	4ly9	4.79			4de3	3.401			3ove	2.31			3h5b	5
3k4q	2.67	4i8n	2.72							3mxe	10.6515	4n7m	4.31			4des	3.493			3owj	2.22			3gst	5
3k5v	3.2	4ieh	3.64							3n0h	3.3335	4tmk	5.62			4det	6.457			3ozj	3.47			3gi6	5
3kdb	2.19	4ijh	3.33							3n1c	2.2517	5er1	3.12			4dew	7.219			3p9m	5.51			3g31	5
3kdc	2.08	4j7e	3.97							3n3g	6.2384	5tmp	3.72			4djq	3.343			3p9t	2.25			3f70	5
3kdd	5.46	4jal	3.17							3ng4	2.4981	2cej	NP			4djy	10.211			3ppm	2.11			3evd	5
3kgt	6.29	4jc1	3.52							3nhi	12.1369	4ezx	NP			4dy6	4.851			3prs	4.73			3dk1	5
3kgu	6.43	4jkw	4.09							3nq3	7.5211	3bzf	NP			4e67	3.457			3pwm	3.87			3djv	5
3kjd	3.34	4jwk	2.79							3nu4	3.6704	2uy0	NP			4ea1	3.291			3pww	6.22			3d1x	5
3kku	3.71	4jx9	2.87							3nuj	2.1578	1bwb	NP			4eb8	3.085			3q71	2.86			3cyw	5
3kmy	2.43	4jyc	3.19							3nw3	7.0059	2uxz	NP			4ef6	5.546			3qbc	4.2			3coz	5
3kyq	2.42	4jym	4.43							3o4k	10.6187	3uri	NP			4emf	2.322			3qfy	3.37			3cj5	5
3l3m	3.57	4k55	4.73							3o5n	4.4838	1izh	NP			4emr	3.852			3qfz	2.23			3bra	5
3l4u	5.08	4kcx	3.87							3o5x	4.7438	2fmb	NP			4er2	3.256			3qgw	2.69			3bqc	5
3l4v	5.37	4km2	2.75							3o6m	9.0232	1bv9	NP			4etz	8.891			3qgy	2.93			3bgc	5
3l4x	3.64	4ksy	2.05							3o9i	7.4793	2cen	NP			4eu0	8.911			3qkd	4.22			3aid	5
3l4y	2.04	4l4z	2.04							3oaf	4.675	4gah	NP			4ew2	4.996			3qoz	3.42			3a5y	5
3lbz	4.16	4loh	2.59							3obx	15.0228	1lzq	NP			4ewn	10.254			3qps	3.5			2zjw	5
3ldp	2.74	4ly9	2.54							3ocp	3.8007	3g08	NP			4ezr	5.925			3qqa	3.74			2yxj	5
3ldq	5.56	4mjo	7.14							3odu	6.1392	1fo0	NP			4ezx	13.096			3qx8	5.7			2yel	5
3lgs	2.48	4mr3	3.15							3ok9	8.9284	4a6b	NP			4ezz	12.991			3qx9	3.34			2wuf	5
3lpp	3.18	4n5d	2.69							3owj	4.0895	2p3a	NP			4fcf	6.032			3qxt	3.14			2vyt	5
3lvw	2.24	4n7m	3.7							3ozj	3.9745	2euk	NP			4fcq	5.165			3r0y	5.2			2uy4	5
3lzz	3.74	4np9	3.76							3ozp	3.944	3o4k	NP			4fht	2.164			3r1v	2.89			2r5p	5
3m3c	2.82	4rsk	2.54							3p2e	8.2605	3ekw	NP			4flp	6.089			3rdv	5.73			2qnq	5
3m3e	5.11	4tmk	6.64							3p3r	2.2752	2q5k	NP			4fnn	6.584			3rt4	7.61			2qi7	5
3m3o	5.65	5er1	3.7							3p8z	2.1496	3bva	NP			4fys	3.133			3ru1	4.49			2qhz	5
3m3z	5.23	5er2	6.82							3p9t	2.9685	1nw5	NP			4fzj	4.769			3rux	2.34			2qhy	5
3mam	3.31	5tmp	10.1							3pe1	2.1517	2er6	NP			4g0p	2.094			3s2v	3.83			2qg2	5
3mss	2.52	8a3h	2.75							3pe2	5.1314	3el9	NP			4g8y	3.511			3s3v	2.82			2q5k	5
3mxd	2.14	2wyj	NP							3pju	4.8212	1w5y	NP			4g90	4.225			3s43	2.22			2oag	5
3mxe	2.83	3bze	NP							3ppm	10.5642	1ec0	NP			4gah	6.936			3s56	4.14			2o4s	5
3myg	6.59	3g08	NP							3prs	11.7968	1w5w	NP			4gny	3.91			3s6t	2.42			2o4l	5
3n0h	3.04	3rt4	NP							3pwd	5.6759	2aoc	NP			4h3f	2.503			3s8o	2.68			2o4k	5
3n3g	2.34	2evl	NP							3pxf	8.7686	1bdq	NP			4h75	9.603			3slz	4.22			2jxr	5
3nee	2.7	1m4h	NP							3q71	2.1863	2q7y	NP			4hdf	3.348			3spf	3.47			2hhn	5
3neo	2.51	2f2h	NP							3qaa	7.7012	3zps	NP			4hj2	6.658			3sr4	2.23			2fdp	5
3nex	2.5	2vh6	NP							3qfy	2.7874	2aog	NP			4hy1	7.492			3st5	2.12			2f81	5
3nq3	2.49	2euk	NP							3qfz	2.2	2aod	NP			4hym	7.447			3t1l	2.39			2f2h	5
3nq9	2.69	4mlu	NP							3qkd	4.3232	2aoe	NP			4i7p	2.979			3t64	4.37			2c3i	5
3nsn	6.31	2eum	NP							3qqa	8.3549	1gvx	NP			4i8n	4.196			3t6b	3.35			2brm	5
3nu3	3.47	3o4k	NP							3qt6	3.705	3k02	NP			4i8z	3.507			3t70	3.65			2bfq	5
3nu6	2.54	4h75	NP							3qx8	7.2967	4djp	NP			4i9u	6.682			3ta0	2.8			2bak	5
3nu9	3.15	3o6m	NP							3qx9	5.8432	1m4h	NP			4ieh	2.178			3ta1	2.39			1zoe	5
3nuj	2.52	2wyg	NP							3r0y	7.73	3slz	NP			4ih5	2.258			3tao	3.22			1xk9	5
3nw3	4.3	3p9m	NP							3rdv	6.3287	2o4k	NP			4ijh	3.428			3tcg	2.52			1w5v	5
3nyx	4.32	3rdv	NP							3rlp	3.8749	1w5x	NP			4io3	3.85			3tf6	5.3			1w4o	5
3o5n	4.27	1xr8	NP							3rlr	4.5085	2avq	NP			4j7e	7.771			3tmk	4.71			1siv	5
3o5x	4.99									3rt4	11.2378	4ezz	NP			4jc1	5.169			3tu7	4.06			1sdv	5
3o99	2.12									3ru1	5.2839	2aqu	NP			4jfm	5.005			3ug2	2.5			1sdu	5
3o9a	3.43									3rv8	4.5325	2avm	NP			4jkw	5.347			3uil	2.02			1r0p	5
3o9d	3.8									3s0d	2.0273	2xye	NP			4jwk	2.455			3umq	4.45			1q84	5
3o9e	2.24									3s2v	2.2498	3v78	NP			4jx9	2.754			3uo4	7.42			1pzp	5
3o9i	3.63									3s3v	2.4938	3ipq	NP			4jyb	2.076			3uod	7.01			1pro	5
3oaf	2.52									3s56	2.8819	3fv3	NP			4jyc	4.983			3up2	6.8			1os5	5
3obq	9.22									3s5y	2.3512	2pk6	NP			4jym	2.352			3upk	4.42			1onz	5
3obu	5.42									3s6t	4.4107	2p3c	NP			4k0y	4.597			3upv	5.75			1odj	5
3obx	5.46									3slz	10.522	3k1j	NP			4k55	6.158			3uri	5.6			1o0f	5
3ocp	6.22									3spf	6.2621	2pk5	NP			4kcx	5.244			3usx	3.79			1njc	5
3odu	2.91									3sut	4.2259	3a2o	NP			4km2	2.629			3uyr	5.7			1mes	5
3ov1	2.38									3suu	4.0906	1fiv	NP			4loh	4.027			3v4t	4.03			1k6t	5
3ove	3.38									3sww	4.8911	2e7l	NP			4loi	7.237			3vje	3.07			1k6p	5
3owj	5.12									3t1a	10.3651	2xyf	NP			4mjo	2.052			3vtr	2.8			1k6c	5
3ozj	4.54									3t64	3.7163	2wkz	NP			4mlu	4.549			3vvy	5.04			1jys	5
3p2e	3.12									3t6b	10.4606	1ivp	NP			4mr3	2.457			3vx3	2.16			1jvu	5
3p3t	3.05									3t70	7.1369	2o4s	NP			5er1	2.093			3zk6	4.29			1jmf	5
3p8z	5.54									3ta0	7.2419	2h21	NP			5er2	14.968			3zll	3.63			1hxb	5
3p9t	3.28									3tcg	3.546	3qaa	NP			5tmp	2.772			3zps	3.7			1hsh	5
3pb3	3.73									3tfu	2.172	3rt4	NP			5yas	2.169			3zpu	2.26			1hps	5
3pju	2.49									3th9	8.8298	3dsz	NP			1nw5	NP			3zqe	3.25			1hpo	5
3ppm	5.14									3tmk	7.0287	1bai	NP			2hw2	NP			3zsq	5.68			1gj8	5
3ppp	4.79									3ttm	4.0444	1fkn	NP			1bxo	NP			3zsx	3.71			1gai	5
3ppr	3.75									3u3u	11.0495	1m0b	NP			1r0p	NP			3zsy	3.98			1g30	5
3prs	8.24									3ueu	9.2392	1dif	NP			3g31	NP			3zv7	2.88			1f4e	5
3pwm	2.28									3uew	11.5402	1qbr	NP			4np9	NP			4a6b	4.81			1epo	5
3pww	6.46									3uex	12.0956	2p3b	NP			3l4u	NP			4a6c	3			1ec1	5
3pxf	6.11									3ug2	2.1793	1qbt	NP			3hmo	NP			4a6l	4.43			1dfo	5
3q6z	6.31									3uil	5.7486	3el1	NP			1f5k	NP			4acc	2.42			1bwb	5
3q71	6.08									3umq	4.6691	4er1	NP			3l4v	NP			4ad3	5.58			1bq4	5
3qaa	3.08									3up2	2.5757					1bxq	NP			4ad6	3.54			1apv	5
3qbc	4									3upv	4.9034					1nvr	NP			4ahr	2.71			1a9q	5
3qdd	2.6									3uri	4.2352					3lpp	NP			4ahs	3.39			4rsk	4
3qfy	3.28									3usx	6.4056					2h21	NP			4ahu	3.1			4n5d	4
3qkd	2.06									3uyr	12.2648					3l4z	NP			4aj4	2.74			4lkk	4
3qox	3.64									3v4t	3.922					3l4y	NP			4ajl	5.75			4jyc	4
3qps	3.78									3v7t	7.5594					3l4x	NP			4arb	3.19			4jyb	4
3qqa	3.43									3veh	6.2725					1fkf	NP			4arw	2.85			4jh0	4
3qx8	5.89									3vtr	8.4167					4ksy	NP			4att	4.52			4ijh	4
3qx9	6.52									3vvy	5.0557									4av4	2.1			4i8w	4
3qxt	4.68									3vw1	6.2581									4b34	3.23			4hp0	4
3qxv	4.91									3vw2	3.1539									4b3b	2.4			4hdf	4
3r0y	6.17									3vx3	4.1249									4b73	3.49			4gfo	4
3r1v	5.71									3w07	2.3066									4b9z	3.46			4g5f	4
3r4m	3.24									3w37	6.879									4bny	3.98			4g0p	4
3rlb	5.07									3wjw	6.5304									4br3	2.38			4ewn	4
3rlp	5.09									3zk6	5.1499									4c1t	2.34			4ej8	4
3rm4	6.18									3zm9	5.85									4ceb	4.6			4ea1	4
3rsx	5.41									3zps	14.229									4dbm	2.96			4ddk	4
3rux	7.56									3zpu	7.2172									4ddm	4.55			4cgi	4
3s3v	3.02									3zsx	4.5041									4de5	3.06			4bny	4
3s43	3.9									3zsy	5.2543									4des	5.98			4b3c	4
3s56	2.87									3zt2	2.6233									4det	3.46			4b34	4
3s6t	2.74									3zt3	3.2996									4djo	3.56			4a6c	4
3s8l	3.58									3zze	2.1245									4djp	3.69			3zps	4
3s8n	2.5									4a4q	10.8909									4djq	5.48			3zlr	4
3slz	4.49									4a6b	10.9825									4djw	2.5			3veh	4
3spf	4.35									4a6l	7.4673									4dld	4.15			3uzj	4
3st5	2.29									4ahr	2.4491									4dy6	5.06			3t3c	4
3sxf	6.44									4aje	2.4207									4e67	4.24			3s8l	4
3t2w	2.43									4arb	2.318									4ea1	2.71			3s3v	4
3t3c	2.11									4arw	6.4703									4efk	5.34			3rv8	4
3t3u	5.32									4auj	4.2473									4ej8	5.11			3rlp	4
3t6b	4.18									4av5	3.4008									4ejl	2.63			3r4m	4
3ta0	6.69									4b2i	2.2432									4emf	2.76			3p8z	4
3tao	3.11									4b3b	2.0967									4emr	3.27			3o9d	4
3tf6	2.63									4b5d	6.5777									4eo6	5			3ng4	4
3th9	3.84									4b9z	6.6264									4eo8	4.7			3nee	4
3tmk	8.01									4bc5	3.3416									4er1	7.1			3mhw	4
3tzm	6.34									4bqs	3.1774									4er2	5.12			3lgs	4
3u10	6.67									4br3	2.304									4eu0	2.73			3kdc	4
3u5l	4.92									4ceb	4.5501									4ew2	4.89			3jyr	4
3u7s	3.98									4daf	3.1447									4ew3	8.58			3jrs	4
3u8k	3.92									4dcs	3.4178									4ewn	2.43			3jdw	4
3u8l	3.49									4ddm	4.1768									4ezr	5.67			3ivc	4
3ueu	3.16									4dds	2.6806									4ezx	7.73			3ies	4
3ug2	2.35									4de5	6.8102									4ezz	10.31			3gcp	4
3uil	4.68									4des	2.1101									4f7v	3.49			3g35	4
3ujb	4.87									4dew	6.8189									4fcf	4.67			3g19	4
3umq	5.83									4djo	10.0665									4fcq	3.36			3fjg	4
3upk	2.39									4djw	2.8149									4flp	6.01			3ekp	4
3upv	4.58									4dy6	3.2986									4fnn	4.7			3eeb	4
3uri	9.23									4e67	4.8622									4fsl	3.37			3djk	4
3usx	4.75									4efk	2.7081									4fxp	4.79			3cyx	4
3uxd	4.91									4emf	2.2896									4fys	4.61			3cow	4
3uyr	3.17									4emr	3.2789									4fzj	4.8			3cct	4
3uzj	3.99									4er1	11.2519									4g5f	5.31			3c2r	4
3v51	4.75									4er2	11.2284									4gah	6.22			3bvb	4
3v5p	6.45									4etz	2.1926									4gg7	3.68			3bug	4
3v5t	5.41									4eu0	3.0711									4gid	3.01			3b50	4
3v78	5.39									4ew2	8.4704									4gny	2.42			3arx	4
3v7t	2.98									4ew3	8.8918									4gu9	2.41			3a6t	4
3veh	2.33									4ewn	5.7651									4h75	6.58			2ya7	4
3vhk	5.78									4ezx	12.6929									4hdf	3.14			2y7p	4
3vje	2.96									4ezz	11.4404									4heg	3.04			2y5f	4
3vvy	5.29									4f7v	3.1379									4hj2	3.35			2xmy	4
3w37	2.4									4fcf	3.2324									4hp0	5			2w9h	4
3zk6	5.07									4fcq	5.0988									4hpi	2.42			2vo4	4
3zll	6.21									4fnn	6.2891									4i8n	4.85			2vh6	4
3zln	6.27									4fxp	8.521									4i8w	2.77			2r2m	4
3zlr	8.47									4fys	3.5204									4i8z	2.51			2qrl	4
3zm9	6.37									4fzj	4.1447									4i9h	4.56			2qrk	4
3zps	5.28									4g0p	4.0694									4i9u	3.19			2qi6	4
3zqe	2.34									4g0q	5.2196									4ieh	4.04			2qi0	4
3zv7	4.48									4g0y	7.877									4ih5	4.31			2qg0	4
4a4q	2.94									4g0z	2.6181									4ijh	4.15			2qd8	4
4a4w	2.51									4g5f	4.5759									4ipn	2.99			2qd6	4
4a6b	2.69									4g8m	2.4841									4j7e	2.26			2qbu	4
4a6c	5.56									4gah	2.8669									4jc1	4.56			2q55	4
4a6l	3.02									4gfo	2.9229									4jfk	2.22			2pwr	4
4ad2	2.19									4gj3	2.0202									4jfm	4.79			2psv	4
4ad3	3.54									4gny	4.8382									4jkw	2.33			2nmz	4
4afg	5.72									4h3f	3.6095									4jwk	2.86			2ihq	4
4ahs	3.12									4h42	5.9564									4jx9	3.78			2ihj	4
4ahu	3.21									4h75	5.5848									4jyc	4.09			2i4d	4
4aj4	2.05									4hj2	17.1524									4k55	5.21			2ha2	4
4ajl	4.27									4hla	7.4763									4kcx	2.24			2gz2	4
4arw	2.2									4hy1	6.6489									4km0	3.89			2fqy	4
4b0b	5.4									4hym	6.5492									4km2	2.6			2f34	4
4b1j	5.81									4i8n	3.6014									4kqp	4.06			2e2p	4
4b33	3.16									4i8w	2.1393									4lkk	4.98			2d0k	4
4b35	3.92									4i8x	2.0965									4lvt	3.68			2cbj	4
4b3b	3.13									4i9h	2.4555									4lxd	2.93			2ca8	4
4b3c	4.01									4i9u	4.9569									4mlu	6.04			2c97	4
4b3d	2.7									4ieh	2.7479									4mr6	3.05			2bmk	4
4b9z	5.88									4ih5	2.1428									4n7m	3.47			2b1i	4
4bi6	3.13									4io7	4.5897									4np9	3.89			2a4m	4
4bi7	3.54									4ipn	6.6213									4sga	5.14			1zoh	4
4bny	5.61									4isu	2.6889									4tmk	3.86			1z6s	4
4br3	2.67									4j28	2.3639									4ts1	3.95			1ydk	4
4cgi	2.15									4j7e	3.8707									5er1	2.99			1xgi	4
4d8z	2.47									4jfk	4.4502									5er2	8.68			1x38	4
4da5	2.8									4jh0	4.8688									5tmp	2.26			1ur9	4
4db7	2.45									4jwk	2.4046									2o1c	NP			1ui0	4
4dbm	3.33									4jx9	2.823									3nht	NP			1t7j	4
4ddk	4.6									4jyb	8.1398									4mdn	NP			1sl3	4
4ddm	5.53									4k18	4.4136													1sbg	4
4ddy	3.24									4k3h	7.215													1s5z	4
4de3	5.51									4k55	4.8536													1rd4	4
4de5	3.74									4kcx	2.5567													1qbv	4
4der	6.86									4km0	4.7322													1qbt	4
4des	6.1									4lkk	2.3207													1qbr	4
4det	3.03									4lvt	2.1339													1pzi	4
4dew	3.15									4lw1	2.1197													1pxn	4
4djo	4.51									4ly9	8.4476													1pvn	4
4djp	3.57									4mjo	8.4936													1om1	4
4djq	2.56									4mlu	12.1624													1ohr	4
4djr	2.7									4mr3	3.2087													1oe8	4
4dkp	2.77									4n7m	2.3664													1nw7	4
4dli	4.76									4np9	6.8492													1nw4	4
4dq2	5.77									4tmk	2.0551													1nhz	4
4dy6	4.34									5er1	10.2347													1mue	4
4e1k	4.43									5tmp	2.5762													1moq	4
4e67	4.23									5upj	6.7287													1mfd	4
4ea1	2.95									7upj	6.4294													1met	4
4ej8	2.09									3bze	NP													1m2r	4
4ejl	2.88									3bzf	NP													1lol	4
4ek9	4.26									2fw6	NP													1lkl	4
4emf	3.31									1fv0	NP													1lf2	4
4emr	2.74									4loi	NP													1kv5	4
4er1	7.26									4loh	NP													1k21	4
4er2	3.09									4k6i	NP													1jn4	4
4etz	3.03									3sio	NP													1jlr	4
4eu0	3.25									3p9m	NP													1hvs	4
4ezr	9.32									1odi	NP													1hih	4
4ezx	8.2									2zym	NP													1h23	4
4ezz	4.14									1nq7	NP													1h22	4
4f3c	4.03									5er2	NP													1gpk	4
4f7v	3.54									1mrx	NP													1g32	4
4fcf	3.22									1dif	NP													1fkb	4
4ffs	4.69									3b67	NP													1f4g	4
4flp	6.14									4a6c	NP													1e4h	4
4fnn	4.91									3nsn	NP													1dar	4
4fsl	5.94									1n7m	NP													1d4y	4
4fys	3.91									2w8y	NP													1d4i	4
4fzj	6.96									3ekw	NP													1bv9	4
4g0q	2.34									3kdc	NP													1bp0	4
4g0z	4.45									3qdd	NP													1bdq	4
4g5f	3.6									1ec2	NP													1apw	4
4g8v	2.52									1fo0	NP													4mjo	3
4gah	8.2									1n46	NP													4k3h	3
4ggz	2.63									3el9	NP													4k0y	3
4gid	6.78									3k02	NP													4jfk	3
4gny	3.43									4ezr	NP													4jal	3
4gq4	2.55									1m4h	NP													4j28	3
4h3f	2.03									1fiv	NP													4isu	3
4h42	5.56									2hw2	NP													4gu9	3
4hdf	2.67									3v78	NP													4gg7	3
4heg	2.91									3vje	NP													4g90	3
4hj2	4.68									2pqc	NP													4g8y	3
4hla	4.31									2byr	NP													4g0y	3
4hp0	3.11									2gv7	NP													4fsl	3
4hpi	2.18									3obq	NP													4dld	3
4i8n	2.46									1b9j	NP													4dkp	3
4i8w	3.75									2e7l	NP													4djw	3
4i8z	4.09									2qnq	NP													4de2	3
4i9h	5.42									2weq	NP													4ddy	3
4ieh	2.94									3f8f	NP													4db7	3
4j28	2.09									4km2	NP													4da5	3
4j7e	4.18									2pqb	NP													4d8z	3
4j93	4.03									1fkn	NP													4bqg	3
4jal	5.4									2rkg	NP													4b3d	3
4jc1	3.32									1odj	NP													4azb	3
4jfs	2.24									3arw	NP													4arb	3
4jh0	2.07									4ksy	NP													4ajl	3
4jkw	3.89																							4aje	3
4jv6	4.02																							4aj4	3
4jwk	2.59																							4ahu	3
4jx9	2.61																							3zln	3
4jyb	7																							3tzm	3
4jym	4.42																							3tu7	3
4k0y	2.59																							3tao	3
4k55	4.66																							3t64	3
4k9y	10.97																							3t1l	3
4kcx	4.35																							3st5	3
4km2	3.29																							3sm2	3
4lkk	2.57																							3s8o	3
4loh	2.28																							3s43	3
4loi	4.52																							3rsx	3
4loo	5.7																							3qxv	3
4m0e	5.9																							3qxt	3
4mr3	3.16																							3qgy	3
4n5d	4.54																							3qgw	3
4n7m	4.77																							3qdd	3
4np9	2.42																							3qbc	3
4rsk	3.16																							3pwm	3
4tmk	7.24																							3pwd	3
5er1	4.01																							3p3r	3
5er2	5.87																							3ozp	3
5tmp	5.51																							3ocp	3
7upj	2.87																							3o9i	3
8a3h	2.57																							3nyx	3
2wyj	NP																							3nuj	3
3bze	NP																							3nu6	3
3g08	NP																							3nu5	3
3rt4	NP																							3nu4	3
2evl	NP																							3nht	3
1m4h	NP																							3myg	3
2f2h	NP																							3lzs	3
2vh6	NP																							3ldp	3
2euk	NP																							3l4z	3
4mlu	NP																							3kjd	3
2eum	NP																							3kdb	3
3o4k	NP																							3k4q	3
4h75	NP																							3jy0	3
3o6m	NP																							3iob	3
2wyg	NP																							3imc	3
3p9m	NP																							3huc	3
3rdv	NP																							3hmo	3
1xr8	NP																							3hb4	3
Note: bp_rmsd means the rmsd of bset pose, NP means no pose was generated by docking. Failure frequencies was also listed at the last two columns.																								3h78	3
																								3ggu	3
																								3g30	3
																								3fhb	3
																								3f78	3
																								3f3u	3
																								3ekv	3
																								3e6y	3
																								3djo	3
																								3d91	3
																								3d78	3
																								3d20	3
																								3d1y	3
																								3cft	3
																								3cda	3
																								3brn	3
																								3arr	3
																								3a2o	3
																								2zb1	3
																								2yki	3
																								2yfx	3
																								2ya6	3
																								2xnb	3
																								2xii	3
																								2xde	3
																								2wyj	3
																								2wyg	3
																								2wnj	3
																								2wnc	3
																								2weq	3
																								2wcg	3
																								2wb5	3
																								2vwc	3
																								2vqt	3
																								2vkm	3
																								2v57	3
																								2uxi	3
																								2sim	3
																								2r58	3
																								2qtt	3
																								2qnp	3
																								2qmg	3
																								2qi1	3
																								2pym	3
																								2pwc	3
																								2pqz	3
																								2pqc	3
																								2on6	3
																								2o4p	3
																								2nta	3
																								2jg0	3
																								2j27	3
																								2il2	3
																								2i4v	3
																								2i4u	3
																								2hw2	3
																								2hs2	3
																								2fxv	3
																								2fvd	3
																								2fgu	3
																								2f80	3
																								2f35	3
																								2f1g	3
																								2ewa	3
																								2cbu	3
																								2brb	3
																								1zgi	3
																								1z3v	3
																								1z1h	3
																								1yc1	3
																								1x8t	3
																								1x8d	3
																								1tpw	3
																								1t7d	3
																								1t32	3
																								1swg	3
																								1srg	3
																								1sqo	3
																								1sdt	3
																								1rnt	3
																								1qk3	3
																								1qan	3
																								1pr5	3
																								1p19	3
																								1ogg	3
																								1odi	3
																								1oba	3
																								1o0m	3
																								1nvq	3
																								1no6	3
																								1njd	3
																								1nc3	3
																								1mu6	3
																								1mfa	3
																								1m7y	3
																								1li6	3
																								1lee	3
																								1kv1	3
																								1km3	3
																								1k6v	3
																								1jsv	3
																								1igj	3
																								1hmt	3
																								1hms	3
																								1hmr	3
																								1gyy	3
																								1g2k	3
																								1flr	3
																								1fkf	3
																								1eby	3
																								1dud	3
																								1d4j	3
																								1d3d	3
																								1bwa	3
																								1br6	3
																								1bm7	3
																								1bcu	3
																								1b6j	3
																								1a4h	3
