# Supplementary material for: Comprehensive evaluation of ten docking programs on a diverse set of protein–ligand complexes: the prediction accuracy of sampling power and scoring power
Source: Royal Society of Chemistry journal article supplement (doi:10.1039/c6cp01555g), 2016-01-01
Supplement: c6cp01555g3.xlsx [file c6cp01555g3.xlsx]

## Sheet: all_failure_cases
pdb_id	formal_charge	rotatable_bonds
1aid	1	6
1bai	1	28
1g7v	-5	12
1gnn	2	19
1gvx	-2	29
1h2t	-3	12
1hi3	-4	6
1hi5	-3	6
1i00	-4	9
1jq8	-1	16
1lzq	-1	19
1m4h	-7	31
1n7m	2	8
1phw	-2	3
1pz5	-3	29
1qhc	-6	14
1sh9	0	18
1str	0	21
1zea	-3	29
2arm	1	4
2bvr	2	8
2bvs	2	16
2ce9	1	20
2er6	-2	29
2euk	0	40
2eum	1	29
2g8r	-1	4
2gj5	0	8
2hkf	-7	27
2ot1	-2	4
2v2q	0	6
2w5g	-4	8
3aaq	-4	11
3b5j	-9	9
3bbb	1	8
3cf8	0	1
3djq	-3	6
3djx	-1	4
3dri	-1	13
3dxg	-2	4
3eax	0	16
3eb1	-2	9
3f8f	1	4
3fvh	-2	18
3g08	0	33
3g34	0	2
3gss	-5	18
3gx0	-6	21
3h1x	-2	5
3h89	2	25
3i73	-3	6
3ie3	-2	8
3ifl	-3	26
3jzh	-4	21
3lzz	-3	6
3o5x	-2	8
3r0y	0	16
3uil	-2	10
3umq	-2	2
3uri	0	28
3usx	-2	12
3uyr	-5	29
3vvy	0	2
3zk6	0	12
4dy6	-4	12
4e67	-2	23
4ezx	1	27
4fnn	-2	16
4gah	-4	28
4h75	4	33
4j7e	1	8
4kcx	1	6
